# Supplementary material for: A Storm-centered Multivariate Modeling of Extreme Precipitation Frequency Based on Atmospheric Water Balance
Source: Copernicus journal article supplement (doi:10.5194/egusphere-2022-391), 2022-06-13
Supplement: Supplementary file [file egusphere-2022-391-RC1-supplement.pdf]

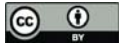

# A Storm-centered Multivariate Modeling of Extreme Precipitation Frequency Based on Atmospheric Water Balance

Yuan Liu<sup>1</sup> and Daniel B. Wright<sup>1</sup>

<sup>1</sup> Department of Civil and Environmental Engineering, University of Wisconsin-Madison, Madison, 53706, USA

5 *Correspondence to:* Yuan Liu (yliu2232@wisc.edu)

**Abstract.** Conventional rainfall frequency analysis faces several limitations. These include difficulty incorporating relevant atmospheric variables beyond precipitation and limited ability to depict the frequency of rainfall over large areas that is relevant for flooding. This study proposes a storm-based model of extreme precipitation frequency based on the atmospheric water balance equation. We developed a storm tracking and regional characterization (STARCH) method to identify precipitation systems in space and time from hourly ERA5 precipitation fields over the contiguous United States from 1951 to 2020. Extreme “storm catalogs” were created by selecting annual maximum storms with specific areas and durations over a chosen region. The annual maximum storm precipitation was then modeled via multivariate distributions of atmospheric water balance components using vine copula models. We applied this approach to estimate precipitation average recurrence intervals for storm areas from 5,000 to 100,000 km<sup>2</sup> and durations from 2 to 72 hours in the Mississippi Basin and its five major subbasins. The estimated precipitation distributions show a good fit to the reference data from the original storm catalogs and are close to the estimates from conventional univariate GEV distributions. Our approach explicitly represents the contributions of water balance components in extreme precipitation. Of these, water vapor flux convergence is the main contributor, while precipitable water and a mass residual term can also be important, particularly for short durations and small storm footprints. We also found that ERA5 shows relatively good water balance closure for extreme storms, with a mass residual on average 10% of precipitation. The approach can incorporate nonstationarities in water balance components and their dependence structures and can benefit from further advancements in reanalysis products and storm tracking techniques.

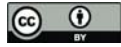

## 1 Introduction

The probability of extreme rainfall is of great interest and importance in flood risk estimation and management (e.g., Koutsoyiannis et al., 1998; Langousis et al., 2009; Nerantzaki & Papalexiou, 2022; Troutman & Karlinger, 2003). Standard practice is to fit a univariate probability distribution to either the largest rainfall observations each year (an annual maxima series) or the rainfall values that exceed a high threshold (a peaks-over-threshold or partial duration series; Coles, 2001; Madsen et al., 1997; Miniussi et al., 2020). In either case, the rainfall series corresponds to a given duration (e.g., 1 hour, 24 hours, etc.) and spatial scale. The latter is usually the sampling orifice of a rain gage (roughly 0.1 m<sup>2</sup>), although larger spatial scales are within reach via techniques such as area reduction factors (ARF; e.g., Durrans et al., 2002), spatial interpolation (e.g., Yang et al., 2015), and stochastic storm transposition (Wright et al., 2013). The resulting probability distributions are then used to extrapolate tail quantiles such as the 100-year average recurrence interval (ARI) storm, which has a 0.01 annual exceedance probability. Though such approaches have proved extremely useful through decades of research and practice, they are not without limitations. To motivate this study, we highlight two such shortcomings here.

First, relying exclusively on rainfall observations—as opposed to using atmospheric and land surface processes and variables that contribute to rainfall—can preclude knowledge and measurements that could be informative for precipitation frequency analysis (Katz et al., 2002; Klemeš, 1993). This contrasts with techniques that estimate probable maximum precipitation—widely used in flood hazard analyses for major dams and nuclear facilities—which for decades have considered concepts and measurements of atmospheric water vapor storage and transport (e.g., Chen & Bradley, 2006; Rakhecha & Clark, 1999; Rousseau et al., 2014; World Meteorological Organization, 2009), and have recently expanded to dynamic atmospheric simulations (e.g., Alaya et al., 2018; Lee & Kim, 2018; Toride et al., 2019). To overcome this limitation, some recent rainfall frequency studies have attempted to use rainfall-related variables (e.g., sea surface temperature and dew point temperature) and changes in large-scale weather systems as predictors of rainfall frequency and its changes (see, e.g., Kunkel, Easterling, et al., 2020; Roderick et al., 2020).

Second, while a single rain gage can provide local observations that lead to ready-to-use quantile estimates (e.g., for flood hazard modeling), it severely restricts the number of extremes and cannot represent areal maxima over a large region. This is because much of the instrumental record at a gage consists of local and smaller events, which have limited value for understanding rarer and more extreme storms at large scales (e.g., Durrans et al., 2002; Steiner et al., 1999; Svensson & Jones, 2010). While this shortcoming can be ameliorated using regionalization techniques that utilize multiple nearby gages (e.g., Dawdy et al., 2012; Schaefer, 1990), these gage-based analyses still struggle to represent precipitation areal maxima due to rain gages' limited sampling area (Matsoukas et al., 1999; Villarini et al., 2008) and the complexity of storm spatiotemporal extents (Efstratiadis et al., 2014; Krajewski, 1987).

In this study, we present an alternative approach for rainfall frequency analysis that addresses these two aforementioned limitations. Here we highlight two key features of our approach:



First, our approach integrates a more physically detailed (albeit still highly simplified) rainfall-producing process. Specifically, we consider the atmospheric water balance equation, in which the change of water vapor storage within a control volume is  
60 balanced by water vapor flux in and out—namely precipitation, evapotranspiration, and water vapor flux convergence (Bradbury, 1957; Banacos and Schultz, 2005; Su and Smith, 2021). Due to mass conservation, precipitation can be modeled as a combination of the remaining components that jointly form a multivariate distribution (Alaya et al., 2020; Klemeš, 1993; Gao et al., 2005). Previous multivariate precipitation modeling of precipitation frequency can be seen in De Michele & Salvadori (2003), Jun et al. (2017), and Salvadori & De Michele (2007), but these focused on joint modeling of “precipitation  
65 dimensions” (e.g., rainfall intensity, volume, and duration) rather than the atmospheric water balance. Here, we use vine copulas to represent this multivariate distribution by decomposing it into bivariate dependence structures and marginal distributions (Aas et al., 2009). Applications of vine copula models have been seen in risk analysis (Bevacqua et al., 2017; Sarhadi et al., 2018; Xiong et al., 2014), rainfall simulation (Gyasi-Agyei and Melching, 2012; Vernieuwe et al., 2015), and streamflow modeling (Pereira and Veiga, 2018), but to the best of our knowledge, no study has applied vine copulas to extreme  
70 rainfall frequency analysis.

Second, our approach is “storm-centered” (Chang et al., 2016; Li et al., 2020; National Research Council, 1994, 1988) rather than gage-centered. We use storm tracking methods to identify and follow two-dimensional rainfall systems (i.e., storm objects) in space and time within a land-atmosphere reanalysis dataset. These storm objects, particularly their high-rainfall areas, are considered as control volumes to compute the atmospheric water balance for multivariate modeling. Our “storm-centered”  
75 approach has three main properties: 1) Unlike gage-centered approaches (Restrepo-Posada and Eagleson, 1982), we can identify all major storms over a region. 2) We can examine precipitation frequency and drivers over user-defined areas, rather than over the spatial scale of a rain gage orifice. This further allows us to derive “storm-centered” depth-area-duration (DAD) relationships and ARIs over a region. Specifically, based on areal precipitation extracted from storm objects, we can characterize how precipitation estimates change with storm area, given a certain ARI and storm duration. 3) The ARIs  
80 estimated by our approach represent the frequency of extreme storms within a chosen region. Such ARIs should be interpreted differently from those in traditional gage-based analysis that represent local precipitation frequencies. The last two properties are discussed in more detail in Sect. 5. Previous “storm-centered” studies have investigated precipitation properties based on observations and model simulations (e.g., Chang et al., 2016; Davis et al., 2006; Hoskins & Hodges, 2002; Pérez-Alarcón et al., 2022; Shaw et al., 2016). Though there has been longstanding recognition that storm-centered methods hold some  
85 advantages over gage-based methods in rainfall frequency analysis (e.g., National Research Council, 1994), far fewer studies have explored the topic (see Wright et al., 2020 for recent review and discussion).

The objective of this study is to develop an alternative approach for extreme precipitation frequency, by integrating storm tracking with a multivariate vine copulas model of atmospheric water balance. The approach allows an explicit representation of the dependencies between rainfall-contributing components. It also highlights some of the strengths and limitations of using  
90 reanalysis and other atmospheric simulations to study extreme rainfall and its drivers. We use the approach to investigate the



frequencies and characteristics of major storms in the Mississippi Basin and its five major subbasins. The remainder of the paper is organized as follows: Sect. 2 describes the study basin and datasets. Sect. 3 details the proposed methods for storm identification and multivariate modeling. Results are shown in Sect. 4, followed by discussion in Sect. 5. Conclusions are provided in Sect. 6.

## 95 2 Study site and datasets

### 2.1 Study site

The study site is the Mississippi River Basin, located in the central United States with a drainage area of over 3,220,000 km<sup>2</sup> and consisting of five major subbasins: the Arkansas-Red, Missouri, Upper Mississippi, Ohio-Tennessee, and Lower Mississippi (Fig. 1). With abundant atmospheric moisture supply from the Gulf of Mexico and the Pacific (e.g., Benedict et al., 2020; Smith & Baeck, 2015), the Mississippi Basin has experienced multiple major storm-induced flood events in recent decades, including in 1993, 2011, and 2019 (Allison et al., 2013; Pal et al., 2020; Rabalais et al., 1998). These have caused major socio-economic impacts throughout the basin (Mutel, 2010; Myers and White, 1993). Previous studies have shown links between extreme storms and anomalously large atmospheric water vapor transport (Holman and Vavrus, 2012; Su and Smith, 2021; Sudradjat et al., 2003) and high precipitable water (Kim et al., 2022; Kunkel et al., 2020b) in the basin.

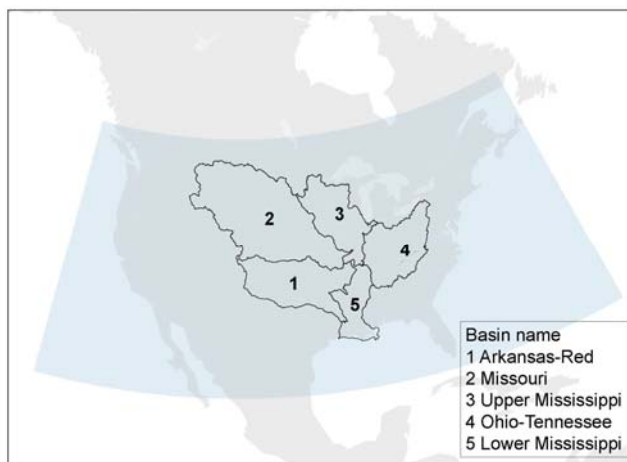

105

**Figure 1.** Mississippi Basin, including 1) Arkansas-Red, 2) Missouri, 3) Upper Mississippi, 4) Ohio-Tennessee, and 5) Lower Mississippi subbasins. Blue shading denotes the domain over which storm tracking was applied (24°–52°N, 60°–130°W).



## 2.2 Datasets

110 ERA5 Reanalysis was used to identify storms and to compute atmospheric moisture components. This dataset, produced by  
 the European Center for Medium-Range Weather Forecasting (ECMWF), provides hourly estimates of global climate variables  
 on a  $0.25^\circ$  grid from 1950 to the present (Hersbach et al., 2020). Studies have shown that ERA5 has improved performance  
 over its predecessor ERA-Interim due to advances in numerical schemes, data assimilation systems, and spatiotemporal  
 resolution (Beck et al., 2019; Urraca et al., 2018; Zhang et al., 2018). In this study, we used 70 years of ERA5 hourly data  
 115 from 1951 to 2020 over the contiguous United States ( $24^\circ$ – $52^\circ$ N,  $60^\circ$ – $130^\circ$ W). The names and descriptions of the variables  
 used are shown in Table 1.

Meanwhile, Integrated Multi-satellite Retrievals for Global precipitation measurement (IMERG) data from 2001 to 2019 were  
 used to validate storm tracking results. IMERG surface precipitation rates are estimated globally on a 30-minute  $0.1^\circ$  scale  
 using a constellation of satellite-based passive microwave and infrared sensors (Huffman et al., 2019); the Final version of  
 120 IMERG V06B used here incorporates monthly gage-based bias correction. We aggregated IMERG to the hourly scale and  
 used a conservative method from the Python package “xESMF” (Zhuang et al., 2020) to regrid IMERG to  $0.25^\circ$  grid to match  
 the boundary and spatial resolution of ERA5.

**Table 1.** Descriptions of used ERA5 variables.

| ERA5 variable                                       | Symbol           | Description                                                                                                                                                          | Unit |
|-----------------------------------------------------|------------------|----------------------------------------------------------------------------------------------------------------------------------------------------------------------|------|
| Mean total precipitation rate                       | $P$              | Precipitation rate at the Earth’s surface.                                                                                                                           | mm/h |
| Mean evaporation rate                               | $E$              | Evapotranspiration rate to the atmosphere from the Earth’s surface.                                                                                                  | mm/h |
| Mean vertically integrated moisture flux divergence | $\nabla \cdot Q$ | Divergence of the vertically integrated water vapor flux. The moisture flux divergence in ERA5 includes cloud liquid and cloud ice, but their values are negligible. | mm/h |
| Total column water vapor                            | $W$              | Total precipitable water, the total amount of water vapor from the Earth’s surface to the top of the troposphere.                                                    | mm   |

125

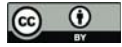

### 3. Methodology

#### 3.1 Storm tracking and regional characterization (STARCH)

To identify and analyze regional extreme storm events in the Mississippi Basin, we developed the Storm Tracking and Regional  
130 Characterization method (STARCH, publicly available at <https://github.com/lorenliu13/starch>). The method can track storms  
based on successive two-dimensional precipitation fields and create catalogs of extreme storm events with specific areas and  
durations within a chosen region. The storm identification and tracking portions of STARCH combine two prior storm tracking  
algorithms: 1) double-threshold identification from the Thunderstorm Identification, Tracking, Analysis, and Nowcasting  
(TITAN) algorithm (Dixon and Wiener, 1993) and 2) “almost-connected component labeling” from the Storm Tracking and  
135 Evaluation Protocol (STEP; Chang et al., 2016). The method, summarized graphically in Fig. 2, consists of four key steps:

Step 1—Storm Identification: Individual storm objects within a precipitation field were identified at a single time step. First,  
an initial threshold of 0.5 mm/h was applied to the precipitation field to identify storm regions. Second, almost-connected-  
component labeling classified closely distributed precipitating regions as a single storm (Fig. 2b). This labeling algorithm used  
a circular morphing structure with radius  $R_m$  to erode and dilate precipitating regions, clustering small regions with nearby  
140 larger ones (more details on almost-connected labeling can be found in Chang et al., 2016). Lastly, the identified storm objects  
were morphologically “grown” to a low threshold boundary of 0.03 mm/h (Fig. 2c). The combination of two thresholds with  
the almost-connected component labeling algorithm can accurately identify individual storms while preserving original storm  
structures. Since a storm system can consist of multiple separated precipitation regions, using a single threshold usually results  
in either too many isolated objects or too few overly-large storms (Steiner et al., 1995). A high threshold within the labeling  
145 algorithm can help associate high-precipitation storm centers with nearby low-precipitation areas. After that, growing to a low  
boundary preserves more precipitation grids and thus can better represent the original storm spatial structures. The high and  
low thresholds were chosen through visual inspection and trial and error.

Step 2—Storm Tracking: In this step, storms were tracked across time steps using the overlapping ratio method (NCAR, 2019).  
For storm  $i$  in current time step  $t_1$  and storm  $j$  in previous time step  $t_0$ , the overlapping ratio  $R$  is the sum of the proportions of  
150 the overlapping area to the two storm areas:

$$R(t_1, i, j) = \frac{A}{A_i(t_1)} + \frac{A}{A_j(t_0)} \quad (1)$$

where  $R(t_1, i, j) \in [0, 2]$  is the overlapping ratio,  $A$  is the overlapping area between storm  $i$  and storm  $j$ ,  $A_i(t_1)$  is the area of  
storm  $i$  at time step  $t_1$ ,  $A_j(t_0)$  is the area of storm  $j$  at time step  $t_0$ ; all the areas are measured by pixels. If two storm objects from  
Step 1 have a sufficiently high threshold value of  $R$ , they are deemed to be a single storm and tracked as such; otherwise, the  
155 more recent object is labeled as a new storm. If multiple possible matches are found between current storms and the previous  
storm, the two having the highest  $R$  are tracked. Based on visual inspection, two consecutive storm objects should generally



have  $R > 0.3$ , whereas two unrelated objects should have a value around 0. We selected an  $R$  threshold of 0.3 based on visual inspection and trial and error. An example of storm tracking is shown in Fig. 2d.

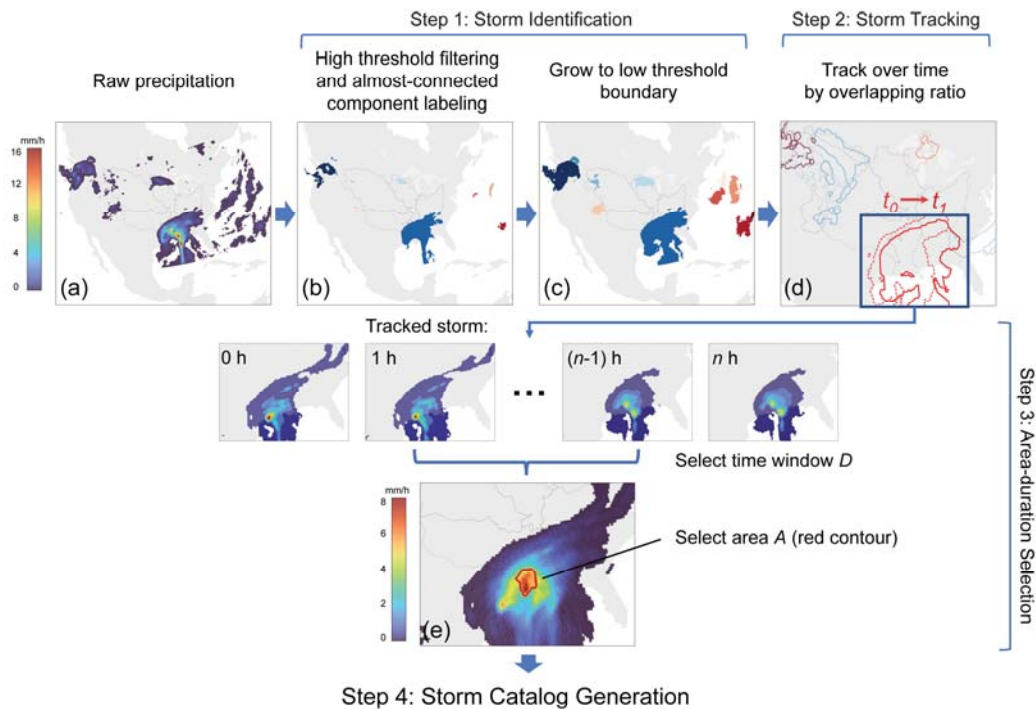

160

**Figure 2.** Process of Storm Tracking and Regional Characterization method (STARCH). (a) ERA5 precipitation at 11:00 UTC on 25 October 2015; (b) Identified storms after high threshold filtering (0.5 mm/h) and almost-connected component labeling. Each color denotes one storm object; (c) Identified storms after growing to low threshold boundaries (0.03 mm/h); (d) Example of storm tracking. Dashed (solid) lines denote storm locations at 10:00 (11:00) UTC on 25 October 2015; (e) Selected storm object (red) with 50,000 km<sup>2</sup> area and 24-hour duration (11:00 UTC on 25 October–10:00 UTC on 26 October in 2015).  
 165 Background colors denote the total precipitation in the 24-hour period.

Step 3—Area-Duration Selection: The third step is to extract extreme precipitation events of desired duration  $D$  and area  $A$  for each subbasin based on the storms identified in Steps 1 and 2. A storm was deemed to have occurred in a subbasin if its area



170 within that subbasin exceeds 2,500 km<sup>2</sup> (about five ERA5 pixels) or its average precipitation over the subbasin exceeded 0.1  
mm/h. For such a storm in the subbasin, we extracted the  $D$  hour period during which the storm had the highest total  
precipitation over the subbasin. Within that extracted period, we applied an area selection algorithm to find a contiguous region  
of area  $A$  that has the highest precipitation in the subbasin. To do this, a binary search is implemented on the total precipitation  
map of the storm to find a precipitation contour whose area value is closest to but less than the desired area  $A$ . Thereafter, the  
175 area selection algorithm recursively expands and recalculates the contour by one pixel at a time until the difference between  
the contoured area and area  $A$  is less than one pixel. An example of the area-duration selection result of a storm event of 24-  
hour and 50,000 km<sup>2</sup> in the Lower Mississippi Basin is shown in Fig. 2e.

Step 4—Storm Catalog Generation: The final step is to quantify storm characteristics and build annual maximum “storm  
catalogs.” For each storm selected in Step 3, we computed the storm area, duration, centroid speed, bearing (clockwise direction  
180 for north of centroid movement), and atmospheric water balance components (described below in Sect. 3.2). The annual  
maximum storm catalogs were created by collecting the largest storm each year with area  $A$  and duration  $D$  for the Mississippi  
Basin and each subbasin.

STARCH was applied to ERA5 from 1951 to 2020 and IMERG from 2001 to 2019 using the parameters from Table 2. Since  
the precipitation patterns in IMERG are somewhat more scattered than those in ERA5, we increased the morphing structure  
185 radius and reduced the precipitation thresholds to avoid overly isolated storm regions. The same overlapping ratio threshold  
was used for both datasets. Afterward, the area-duration selection was applied to ERA5 storms for the five subbasins and the  
whole Mississippi Basin. Values of storm area  $A$  were 5,000, 25,000, 50,000, and 100,000 km<sup>2</sup>, and values of storm duration  
 $D$  were 2, 6, 12, 24, 48, and 72 hours. This combination of areas and durations resulted in 24 annual maximum storm catalogs  
for each subbasin and 144 cases in total.

190

**Table 2.** Parameter settings used in STARCH.

| Precipitation Dataset | Morph radius $R_m$ (pixel) | High threshold (mm/h) | Low threshold (mm/h) | Overlapping ratio threshold (-) |
|-----------------------|----------------------------|-----------------------|----------------------|---------------------------------|
| ERA5                  | 4                          | 0.5                   | 0.03                 | 0.3                             |
| IMERG                 | 6                          | 0.3                   | 0                    | 0.3                             |



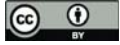

### 3.2 Atmospheric water balance

195 This study treats each storm area identified by STARCH as a control volume for computing a vertically integrated atmospheric water balance (Su and Smith, 2021), which can be written as:

$$\frac{\partial W}{\partial t} = E - P - \nabla \cdot Q \quad (2)$$

where  $W$  is total precipitable water (mm),  $E$  is evapotranspiration to the atmosphere from the Earth's surface (mm/h, positive if directed upward, i.e., entering the storm control volume),  $P$  is precipitation (mm/h, positive if directed downward).  $\nabla \cdot Q$  is  
200 the divergence of the vertically integrated water vapor flux vector (mm/h, negative  $\nabla \cdot Q$  indicates convergence of water vapor into the storm). Equation (2) relates the temporal change in precipitable water to land surface evapotranspiration, precipitation from the atmosphere, and water vapor flux convergence.  $W$ , in units of mm, is defined as:

$$W = \int_0^{z_t} \rho_v(z) dz \quad (3)$$

where  $\rho_v(z)$  is the water vapor density ( $\text{kg/m}^3$ ) and  $z_t$  is the height of the troposphere above ground level. The divergence  
205 term is based on the vertically integrated water vapor flux vector  $Q = (Q_x, Q_y)$ , defined as:

$$Q_x = \int_0^{z_t} \rho_v(z) u(z) dz \quad (4)$$

$$Q_y = \int_0^{z_t} \rho_v(z) v(z) dz \quad (5)$$

where  $u(z)$  and  $v(z)$  are the east-west and north-south components of the wind (m/s),  $Q_x$  and  $Q_y$  have the units of  $\text{kg/m/s}$ ,  
210 representing the mass flux of water vapor across a plane of unit width in the east-west and north-south directions, respectively, extending to the top of the troposphere.

All water balance components ( $\frac{\partial W}{\partial t}$ ,  $E$ ,  $P$ , and  $\nabla \cdot Q$ ) in Eq. (2) were computed for storms in each storm catalog described in

Sect. 3.1 based on the ERA5 variables in Table 1. The time derivative term  $\frac{\partial W}{\partial t}$  was computed by central differencing the total precipitable water  $W$  within the storm duration. These components form the basis of the multivariate extreme precipitation modeling described next.



215 **3.3 Multivariate vine copula model**

This section describes a multivariate vine copula model to estimate the frequency of extreme precipitation based on other atmospheric water balance components. According to Eq. (2), precipitation can be calculated as the sum of the evapotranspiration, water vapor flux divergence, and the time derivative of total precipitable water. In principle, the water balance is closed by mass conservation. However, due to data assimilation and differencing schemes, ERA5 does not guarantee water balance closure (see Sect. 5.1 for further discussion). Therefore, a residual error term was to Eq. (2):

$$P = E - \nabla \cdot Q - \frac{\partial W}{\partial t} + \varepsilon \quad (6)$$

where  $\varepsilon$  is the water balance residual (mm/h), i.e., the difference between precipitation and the sum of remaining water balance components.

Treating the right-hand side terms in Eq. (6) as random variables, precipitation can be represented by a multivariate distribution

225  $P = F(E, \nabla \cdot Q, \frac{\partial W}{\partial t}, \varepsilon)$ . According to Sklar's theorem, a four-variate distribution can be expressed using copulas and marginal distributions of random variables (Aas et al., 2009):

$$F(x_1, x_2, x_3, x_4) = C(F_1(x_1), F_2(x_2), F_3(x_3), F_4(x_4)) \quad (7)$$

where  $F(\cdot)$  is the joint cumulative distribution function (CDF),  $F_1(x_1) \cdots F_4(x_4)$  represent the marginal CDFs of the components on the right-hand side of Eq. (6), and  $C$  is the copula describing the dependence structure between those 230 components. The joint probability density function (PDF) of the multivariate model  $p(\cdot)$  can be factorized with conditioning:

$$p(x_1, x_2, x_3, x_4) = p(x_1 | x_2, x_3, x_4) p(x_3 | x_2, x_4) p(x_2 | x_4) p(x_4) \quad (8)$$

among which the conditional PDF can be rewritten with a bivariate copula, for example:

$$p(x_1, x_2 | x_j) = c_{12|j}(F_{1|j}(x_1 | x_j), F_{2|j}(x_2 | x_j)) p(x_1 | x_j) p(x_2 | x_j) \quad (9)$$

where  $c_{12|j}$  is the copula density between  $x_1|x_j$  and  $x_2|x_j$ . Based on Eq. (9), Eq. (8) is further decomposed into bivariate copulas

235 and marginal PDFs:

$$\begin{aligned} p(x_1, x_2, x_3, x_4) = & p_1(x_1) p_2(x_2) p_3(x_3) p_4(x_4) \\ & \cdot c_{12}(x_1, x_2) c_{24}(x_2, x_4) c_{43}(x_4, x_3) & T_1 \\ & \cdot c_{14|2}(x_{1|2}, x_{2|4}) c_{23|4}(x_{2|4}, x_{4|3}) & T_2 \\ & \cdot c_{13|24}(x_{1|24}, x_{3|24}) & T_3 \end{aligned} \quad (10)$$

The decomposition can be illustrated by a tree structure in Fig. 3a, where the nodes are variables and the edges are bivariate copulas.  $T_1$ ,  $T_2$ , and  $T_3$  are the tree levels that represent the corresponding parts of Eq. (10). This representation of the joint

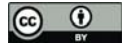

PDF via bivariate copulas is called a vine copula. Vine copulas hold advantages for high-dimension modeling, since one only  
240 needs to estimate bivariate copulas and corresponding conditional CDFs to obtain an estimator of the joint PDF. On the other  
hand, the decomposition in Eq. (8) is not unique, leading to different possible tree structures and necessitating model selection.

We used the R package “VineCopula” to sequentially select vine structures and estimate copula parameters (Nagler et al.,  
2021). First, the tree structure at the top level ( $T_1$ ) was determined by the max spanning trees to maximize the sum of the edge  
weights. The commonly-used edge weight is the absolute value of Kendall’s  $\tau$  correlation coefficient between variables on the  
245 nodes. Second, for each pair of variables, the parameters of the bivariate copulas were estimated using Maximum Likelihood  
Estimation, and the best bivariate copula was chosen based on the Akaike Information Criterion. The above procedure was  
repeated on the next tree level until reaching the bottom level to complete the vine copula estimation. The marginal CDFs of  
the water balance components are also required. We fitted empirical CDFs for  $E$ ,  $\frac{\partial W}{\partial t}$ , and  $\varepsilon$  with Weibull plotting position  
(Dingman, 2015), which is commonly chosen in fitting vine copulas. However, empirical CDFs will constrain the simulated  
250 water balance components to the maximum in the sample data, which can lead to unrealistic upper-bounded tail behavior. To  
overcome this, we fitted the divergence term  $\nabla \cdot Q$  using the generalized extreme value (GEV; e.g., Walshaw, 2013)  
distribution:

$$F(x; \mu, \sigma, \gamma) = \exp\left\{-\left[1 + \gamma\left(\frac{x - \mu}{\sigma}\right)\right]^{\frac{1}{\gamma}}\right\} \quad (11)$$

where  $F(\cdot)$  is the CDF of the GEV distribution,  $x$  is the divergence term,  $\mu \in (-\infty, +\infty)$  is the location parameter measuring  
255 the central tendency of extremes,  $\sigma \in (-\infty, +\infty)$  is the scale parameter measuring the variability of extremes.  $\gamma$  is the shape  
parameter that determines the type of the GEV distribution and tail behavior. We chose the divergence term to fit the GEV  
distribution because of its dominant role in the atmospheric water balance in extreme storms (described further in Sect. 4.4).  
The GEV distribution was estimated by the L moments method (e.g., Gubareva & Gartsman, 2010) via the R package  
“extRemes” (Gilleland, 2021). Figure 3b shows an example of a fitted vine copula model, where each subplot is a normalized  
260 bivariate copula contour representing the dependence structure between variables in Fig. 3a. The orientation of the contours  
denotes positive or negative tail dependence, while the contour width denotes the strength of the correlation.

For each annual maximum storm catalog described in Sect. 3.1 (144 cases in total), we fitted an individual vine model to the  
water balance components ( $E$ ,  $\nabla \cdot Q$ ,  $\frac{\partial W}{\partial t}$ , and  $\varepsilon$ ). The fitted model was used to simulate samples, where each sample  
represents a possible combination of water balance components in an annual maximum event. “Synthetic” precipitation annual  
265 maxima were then calculated from these components based on Eq. (6). Model uncertainty was quantified via the parametric  
bootstrapping method of Bevacqua et al. (2017) and summarized here. First, a vine copula model was fitted based on the annual  
maximum storm catalog ( $n=70$ ). Second, we used the fitted model to simulate samples of size 70 and repeated 100 times (i.e.,



to obtain 100 bootstrap realizations). Based on each bootstrap realization, we fitted a new vine copula model, retaining the same vine copula structure as that fitted based on the original storm catalog but reselecting and re-estimating the bivariate  
270 copulas. We used each fitted model to simulate 500 samples to calculate associated precipitation, equivalent to 500 years of annual maxima. Precipitation frequency was then estimated by the empirical CDF using the Cunnane plotting position (Cunnane, 1978; other plotting position formulae were tested and results were very similar):

$$\hat{F}(x_{(i)}) = \frac{i - 0.4}{n + 0.2} \quad (12)$$

where  $\hat{F}(\cdot)$  is the empirical CDF,  $x_{(i)}$  is the  $i$ th ranked value of precipitation, and  $n$  is the number of simulated events. Another  
275 way of bootstrapping is to generate bootstrap realizations ( $n=70$ ) by randomly sampling data with replacements from the annual maximum storm catalog and use each realization to fit a vine copula model. These bootstrapping results were not shown because the estimates were similar.

We also computed Relative Root Mean Square Error (RRMSE) to measure discrepancies between simulated and reference precipitation at the same recurrence intervals:

$$RRMSE = \frac{\sqrt{\frac{1}{n} \sum_{i=1}^n (x_{(i)} - x_{(i)}^{ref})^2}}{\frac{1}{n} \sum_{i=1}^n x_{(i)}^{ref}} \quad (13)$$

where  $x_{(i)}^{ref}$  is the  $i$ th ranked reference precipitation from the storm catalog with recurrence interval empirically determined by the Cunnane plotting position,  $x_{(i)}$  is the  $i$ th mean simulated precipitation with the same recurrence interval,  $n = 70$  is the size of the storm catalog.

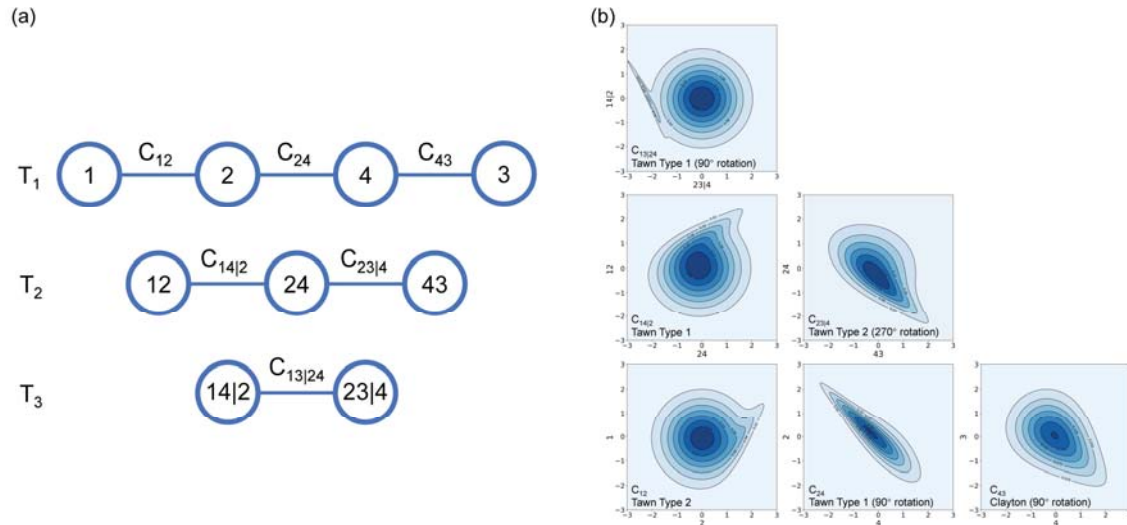

285

**Figure 3.** (a) A vine copula tree structure for atmospheric water balance components ( $d = 4$ ), where 1, 2, 3, and 4 represent water balance components. Note that the permutation is not unique and depends on model fitting; (b) Normalized bivariate copula contour plots of all pair copulas specified in the copula tree structure in (a). The contour colors represent the copula densities.

290

## 4. Results

### 4.1 Storm identification and tracking

In this section, STARCH storm tracking results based on ERA5 were compared with those from IMERG. This comparison is intended to validate the basic spatiotemporal properties of ERA5-simulated storm systems against observation-based IMERG results. This was done via visual inspection of storm tracks and comparing storm characteristics between the two data sets for the 2001-2019 period. An example over 9 hours is shown in Fig. 4. Precipitation regions in ERA5 are generally more contiguous in space than in IMERG. Despite some local differences, storm patterns are generally similar between the two data sets. This is confirmed by the large-sample comparison of the storm characteristics shown in Table 3. The average area (maximum precipitation intensity) of ERA5 storms is 7% (2%) higher than IMERG storms, while the average speed (bearing) differs by 4% (7%). Discrepancies in storm duration and number are slightly larger: storms in ERA5 last 26% longer than those in IMERG, while the number of storms per hour is about 20% smaller. These differences are attributable to the

300



intermittent precipitation regions in IMERG, where the scattered precipitation grids around the storm body are likely to be identified as individual storms with shorter lasting time. In summary, despite some discrepancies, ERA5 storm object properties are roughly consistent with a satellite-based observational dataset, lending support to subsequent analyses that rely on ERA5-based objects.

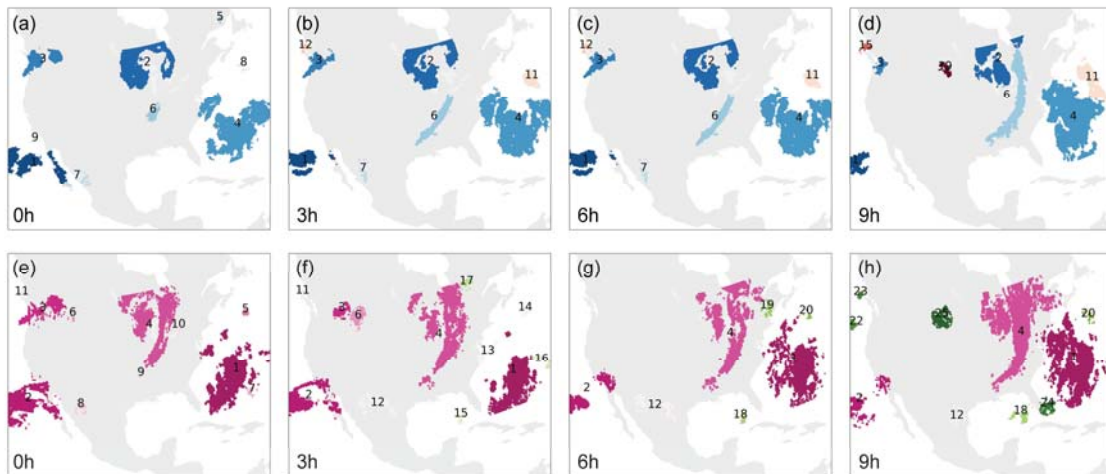

**Figure 4.** Comparison of storm tracking results based on ERA5 (a, b, c, d) and IMERG (e, f, g, h) starting at 20:00 UTC on 12 October 2015. Each tracked storm object is marked with one label and color through time.

310 **Table 3.** Comparison of the average storm characteristic based on ERA5 and IMERG datasets from 2001 to 2019.

|                | Max intensity<br>(mm/h) | Area<br>(km <sup>2</sup> ) | Duration<br>(hour) | Speed<br>(km/h) | Bearing<br>(°) | Number<br>(hour <sup>-1</sup> ) |
|----------------|-------------------------|----------------------------|--------------------|-----------------|----------------|---------------------------------|
| ERA5           | 1.4                     | 85574.3                    | 7.8                | 36.3            | 11.1           | 0.8                             |
| IMERG          | 1.3                     | 79466.4                    | 5.8                | 37.8            | 10.3           | 1.0                             |
| Difference (%) | 2                       | 7                          | 26                 | -4              | 7              | -20                             |



315 **4.2 Goodness-of-fit of the vine copula model**

Goodness-of-fit of the vine copula models was assessed by comparing model simulations with reference data from the annual maximum storm catalogs. Quantile-quantile (Q-Q) plots were used to compare water balance components from reference data against simulated values at the same quantile. The simulations here were generated from 100 bootstrap realizations with a sample size of 70. By examining the Q-Q plots of all the 144 cases, we found the points of reference values and mean simulations fall approximately on the diagonal line, indicating satisfying model fitting (see Fig. 5 for one example). The good fitting is also supported by Pearson's correlation coefficients between sorted reference data and mean simulations. The mean correlation coefficient is 0.995 for  $E$ , 0.992 for  $\nabla \cdot Q$ , 0.997 for  $\frac{\partial W}{\partial t}$ , and 0.993 for  $\varepsilon$ , with standard deviations of 0.005, 0.005, 0.002, and 0.007, respectively.

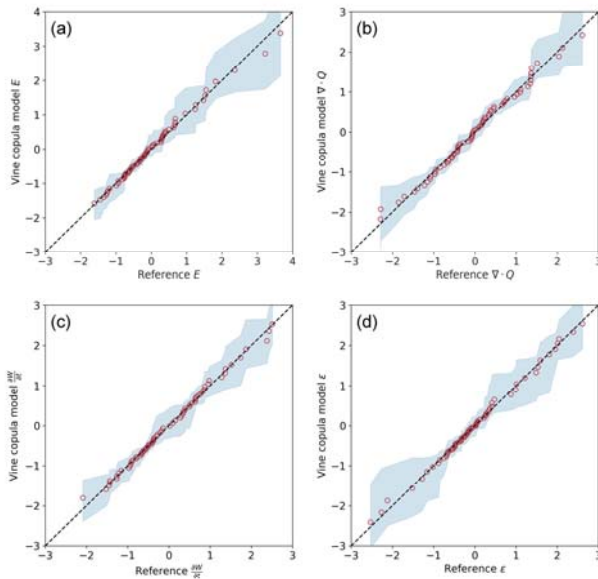

325 **Figure 5.** Q-Q plots of standardized atmospheric water balance components between vine copula simulations and reference data from the storm catalog in the Arkansas-Red Basin with storm area of 25,000 km<sup>2</sup> and duration of 2 hours. The red circle denotes the mean of simulated values with the reference data at the same percentile. Blue shading denotes the spread of simulations from bootstrapping.

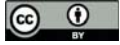

330 We compared copula-simulated precipitation annual maxima against the reference ERA5 precipitation annual maxima from each storm catalog. The ARI of the reference and simulated precipitation was estimated using Cunnane plotting position. An example of one storm catalog can be seen in Fig. 6; a GEV distribution fitted to the ERA5 precipitation annual maxima using L moments is also shown. Both the univariate GEV and vine copula models can describe the distribution of reference precipitation, with copula estimates slightly exceeding those of the GEV—and **hewing** more closely to the reference—for recurrence intervals above 10 years. By examining all 144 storm catalogs, we found that both vine and GEV models agree well with the empirical distributions of the reference data. Good agreement between the model and reference data is also supported by small RRMSEs with a mean of 3% and a standard deviation of 1%, indicating that the vine model can depict the dependence structures between atmospheric water balance components to generate realistic precipitation ARIs.

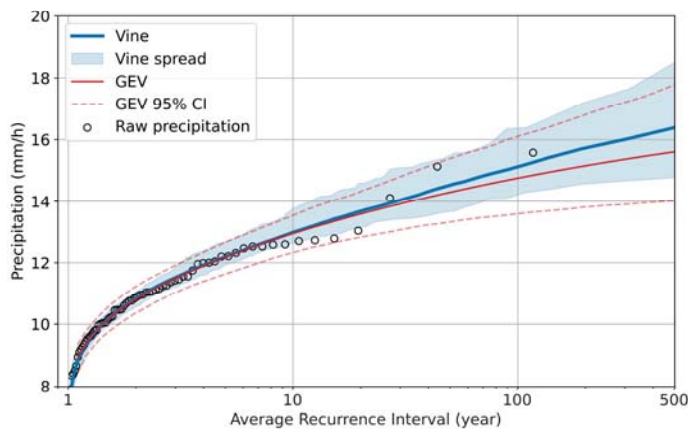

"hewing" = cutting or chopping. [Concise Oxford Dictionary] This is the ONLY word I want to alter so far in this article. Try "cleaving" = 'stick fast' [COD again]

340 **Figure 6.** Comparison of estimated return levels of precipitation between vine copula and GEV models in the Arkansas-Red Basin with storm area of 25,000 km<sup>2</sup> and duration of 2 hours.

#### 4.3 Recurrence Interval estimates of the vine copula model

100-year precipitation rate return levels from the vine copula and univariate GEV models were calculated for all 144 storm catalogs (Fig. 7; results of 10-year and 500-year return levels are also shown in Figs. A1 and A2 in Appendix A, respectively). As expected, the precipitation rate decreases with increasing storm area and duration. The storm catalog for the entire Mississippi Basin yields the overall highest precipitation estimates, varying from 3.8 to 31.0 mm/h depending on the storm area and duration; this is to be expected since the storm catalog consists of the most extreme storms from all individual



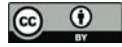

subbasins. The Lower Mississippi Basin is the wettest subbasin with precipitation ranging from 2.9 to 28.8 mm/h. Estimates generally decrease for subbasins farther away from the Gulf of Mexico’s moisture supply. 100-year precipitation from the vine models agrees well with those from the GEV, with the percent difference on average less than 4%. Generally, the vine model estimates are higher than GEV for 100-year storms with duration  $\leq 12$  hours or area  $\leq 25,000$  km<sup>2</sup>. The difference between the two models grows as ARI increases (see Figs. B1-2).

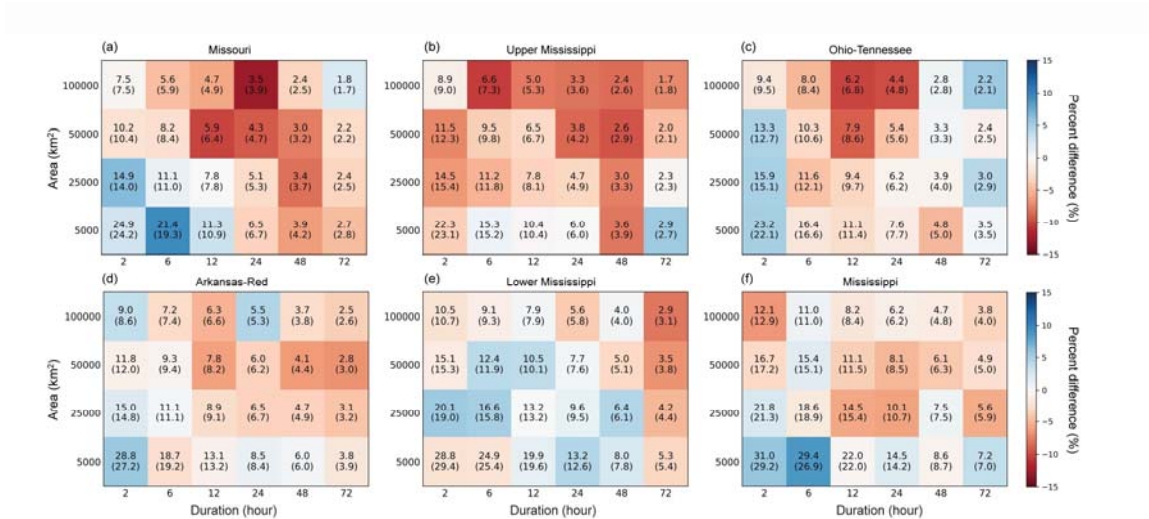

355 **Figure 7.** Estimated 100-year precipitation rate (mm/h) by vine copula and univariate GEV models. GEV estimates are shown in parentheses. Background color denotes the percent difference between vine copula and GEV estimates.

100-year DAD relationships based on vine copula estimates for the Upper Mississippi Basin are shown in Fig. 8a. At the 5,000 km<sup>2</sup> scale, precipitation depth increases by 105% (21%) from 2 to 6 hours (48 to 72 hours). When the area grows from 5,000 to 100,000 km<sup>2</sup>, the difference between 72-hour and 2-hour depths reduces from 165 mm to 107 mm. For a fixed duration, the depth decreases quickly between 5,000 and 25,000 km<sup>2</sup> and then slowly until reaching 100,000 km<sup>2</sup>. For 72-hour storms, the depth decreases by 41% (210 to 124 mm) from 5,000 km<sup>2</sup> to 100,000 km<sup>2</sup>, while for 2-hour storms, the decrease is 61% (45 to 18 mm).

Our approach can characterize the areal distributions of storm precipitation at different frequency levels. Fig. 8b shows depth-area relationships for 24-hour storms with ARIs ranging from 2 to 500 years in the Upper Mississippi Basin. The precipitation estimates are the highest at 5,000 km<sup>2</sup>, ranging from 95 mm (2-year ARI) to 155 mm (500-year ARI). Such difference between



2-year and 500-year depths decreases as area increases. The reduction in precipitation depth with increasing area (i.e., the slope of line segments connecting different areas) is relatively consistent across all ARIs. This suggests that area-depth relationships tend to be independent of storm recurrence intervals. Similar to other types of statistical models of extremes, the uncertainties increase with ARI (also shown in Fig. 6).

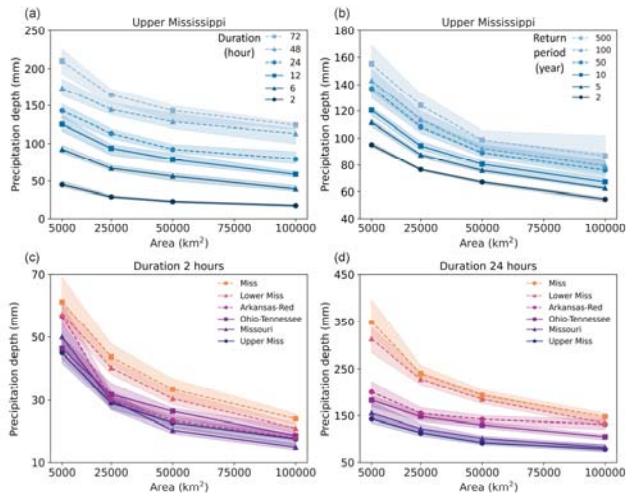

**Figure 8.** Estimated DAD curves. (a) Upper Mississippi basin with 100-year ARI and different durations. (b) Upper Mississippi basin with the duration of 24 hours and different ARIs. (c) Comparison between subbasins with 2-hour duration and 100-year ARI. (d) Comparison between subbasins with 24-hour duration and 100-year ARI. Markers denote the mean precipitation depth with the specific area. Shading denotes the spread of model estimates.

We also compared DAD relationships across subbasins. Figures 8c-d show the precipitation estimates for 2-hour and 24-hour storms with 100-year ARI in the six basins. Many of these largest storms are from the Lower Mississippi Basin. At the 2-hour duration, the overall Mississippi Basin has depth estimates between 24 mm (100,000 km²) and 61 mm (5,000 km²), followed by the Lower Mississippi Basin ranging from 21 mm to 57 mm. The depth in the Arkansas-Red Basin is 57 mm at 5,000 km², dropping to 30 mm at 25,000 km² and 18 mm at 100,000 km². The remaining three subbasins have similar results of 15-19 mm at 100,000 km² and 45-50 mm at 5,000 km².

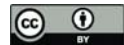

Subbasin differences between the DAD curves are more substantial at the 24-hour duration (Fig. 8d). Akin to the 2-hour duration, Mississippi and Lower Mississippi Basins have similar curves and higher precipitation than the other subbasins. The 24-hour duration curves for the Arkansas-Red and Ohio-Tennessee Basins are similar, while Missouri and Upper Mississippi Basins are quite close. Overall, the differences in DAD relationships indicate strong spatial heterogeneity of extreme storms inside the Mississippi Basin, presumably stemming from distance to significant moisture sources.

#### 4.4 Atmospheric water balance in extreme storms

##### 4.4.1 Magnitude of water balance components

This section provides a deeper examination of ERA5 water balance components used in the vine copula model.  $\nabla \cdot Q$  represents the water vapor supply from nearby regions. Recall that a negative value—which is the case in all catalogs—indicates that water vapor is moving into the storm (i.e., convergence). The divergence term has the highest magnitude, indicating its central role in extreme precipitation (Fig. 9a). The mean (standard deviation) of divergence decreases from -9.1 to -3.5 mm/h (6.7 to 1.9 mm/h) with increasing area and decreases from -12 to -2 mm/h (5.5 to 0.6 mm/h) with increasing duration, reflecting the reality that very high rates of water vapor inflow cannot be sustained over large areas or long periods.

The sum of  $\frac{\partial W}{\partial t}$  and  $\varepsilon$  constitute an average of 17% of precipitation, with some cases reaching as high as 35%.  $\frac{\partial W}{\partial t}$  is negative in most cases (Fig. 9b), indicating that water vapor is “lost” to precipitation. The term does not vary with storm area, remaining around 0.3 mm/h. However, the mean (standard deviation) of  $\frac{\partial W}{\partial t}$  does decrease with duration, from -0.6 (0.4) mm/h at 2 hours to -0.08 (0.02) mm/h at 72 hours. For longer durations, the mean approaches zero, consistent with the expectation of the long-term atmospheric water balance (Gutenstein et al., 2021).

As mentioned in Sect. 3.3, the residual  $\varepsilon$  is introduced to compensate for the imperfect closure of atmospheric water balance in ERA5. Most residual terms are negative, indicating that the sum of  $E$ ,  $\nabla \cdot Q$ , and  $\frac{\partial W}{\partial t}$  tends to be higher than ERA5 precipitation. The residual constitutes 10% of the precipitation on average. As shown in Fig. 9c,  $\varepsilon$  is the highest at 5,000 km<sup>2</sup>, with a mean (standard deviation) of -1.6 (1.6) mm/h. The mean (standard deviation) decreases to -0.2 (0.2) mm/h at 100,000 km<sup>2</sup>. The residual also decreases with increasing duration. For 2-hour storms, the mean (standard deviation) is -1.6 (1.6) mm/h while for 72-hour storms, the mean (standard deviation) is -0.12 (0.09) mm/h.

Contrary to long-term water balances (Berrisford et al., 2011; Gutenstein et al., 2021), the evapotranspiration term for extreme storms is small at around 3% of precipitation (Fig. 9d). The mean of the evapotranspiration rate decreases from 0.12 to 0.09



410 mm/h with increasing area, and the standard deviation decreases from 0.08 to 0.03 mm/h (though the median is relatively constant with area). There is no clear relationship between  $E$  and storm duration.

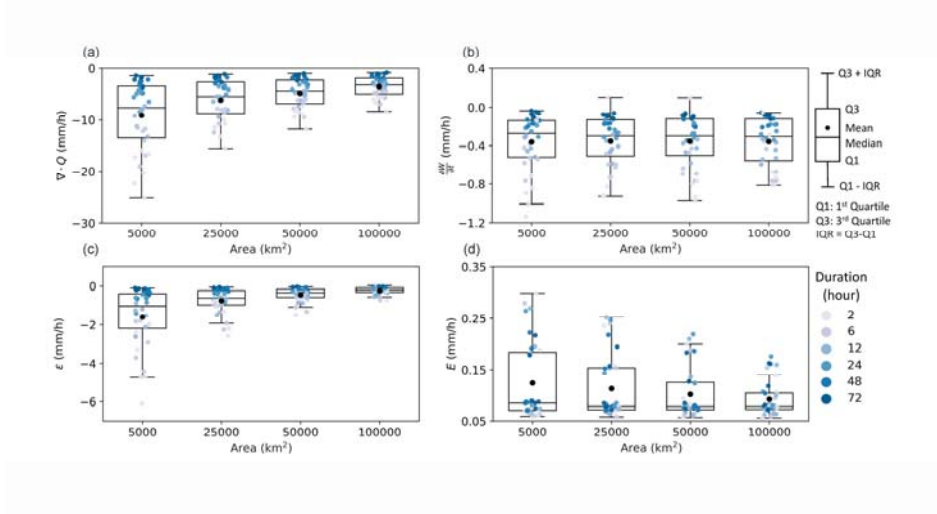

**Figure 9.** Boxplots of the average water balance components. Points show the average of the water balance components from each storm catalog, with colors denoting storm durations.

415

#### 4.4.2 Dependency structure of moisture balance components

Kendall's  $\tau$  nonparametric rank correlation coefficients (Abdi, 2007) were computed between all water balance components for each of the 144 storm catalogs. The means and standard deviations of these correlations are shown in Table 4. The strongest correlation of -0.64 was found between divergence and precipitation. The divergence term also shows a relatively strong correlation of 0.42 with the residual term. Evapotranspiration is unrelated to the other components, with mean correlations less than 0.1. The correlations between the time derivative term and the residual (precipitation) are also very weak, with average coefficients of 0.07 (-0.05), respectively. We repeated this correlation analysis based on vine copula model simulations, finding very similar results to Table 4 (results not shown).

425



**Table 4.** The mean and standard deviation (in parenthesis) of Kendall’s  $\tau$  correlation coefficients between water balance components. For each of the 144 storm catalogs, Kendall’s  $\tau$  correlation coefficient was computed between two components; the means and standard deviations shown here were obtained from Kendall’s  $\tau$  from all the storm catalogs.

|                                 | $E$ | $\nabla \cdot Q$ | $\frac{\partial W}{\partial t}$ | $\varepsilon$   | $P$             |
|---------------------------------|-----|------------------|---------------------------------|-----------------|-----------------|
| $E$                             | -   | -0.03<br>(0.14)  | 0.01<br>(0.11)                  | -0.04<br>(0.09) | 0.09<br>(0.16)  |
| $\nabla \cdot Q$                |     | -                | -0.19<br>(0.12)                 | 0.42<br>(0.11)  | -0.64<br>(0.12) |
| $\frac{\partial W}{\partial t}$ |     |                  | -                               | 0.07<br>(0.12)  | -0.05<br>(0.09) |
| $\varepsilon$                   |     |                  |                                 | -               | -0.23<br>(0.12) |
| $P$                             |     |                  |                                 |                 | -               |

430 We further examined how correlations between water vapor components depend on storm area and duration (Fig. 10). The average correlation coefficient between the divergence and time derivative term increases with storm area (Fig. 10a), while exhibiting a more complex pattern for duration—increasing from 0.21 at 2 hours to 0.24 at 24 hours and then decreasing to 0.15 at 72 hours (Fig. 10b). For the divergence and the residual terms, the mean correlation drops from 0.5 to 0.34 with increasing area and from 0.46 to 0.35 with increasing duration. Average correlation between the divergence and precipitation terms decreases from 0.69 to 0.58 with increasing area while rising from 0.49 at 2-hour duration to 0.75 at 72-hour duration. Average correlation between the time derivative and residual terms shows a modest reduction from 0.13 to 0.08 with increasing area, and a larger drop, from 0.29 to 0.17, with increasing duration. Average correlation between residual and precipitation terms drops from 0.29 to 0.17 with increasing area, while it increases from 0.18 at 2-hour to 0.27 at 24-hour and drops to 0.23 at 72-hour duration. In short, there are complex relationships among water balance components that depend on storm  
 440 spatiotemporal scale and that cannot be ignored in any attempt at modeling their joint roles in extreme precipitation.

The correlation analyses shown in Table 4 and Fig. 10 are imperfect representations of the dependency structure between water balance components, since correlation coefficients distill bivariate distributions into a single number. The vine copula, on the other hand, can capture such structures. More detailed relationships can be seen by plotting the simulation results from the vine copula model. Figure 11 shows an example—the 25,000 km<sup>2</sup>, 2-hour storm catalog for the Arkansas-Red Basin. The  
 445 lower portion of the plot shows the conditional distribution of one water balance component for a fixed value of a second component, with the red line showing the median and the shaded contours denoting deciles. Nonlinear relationships can be



seen in  $\varepsilon$  vs.  $\nabla \cdot Q$ ,  $\varepsilon$  vs.  $\frac{\partial W}{\partial t}$ , and  $\varepsilon$  vs.  $P$ . The histograms along the diagonal show the marginal distributions of each water balance component used in the vine copula model; the divergence term's histogram is smooth due to the use of a GEV marginal distribution, while the other three components used empirical marginals (see Sect. 3.3). Note that the correlation coefficients for  $\frac{\partial W}{\partial t}$  vs.  $\varepsilon$  and  $\frac{\partial W}{\partial t}$  vs.  $P$  are 0.30 and -0.23, respectively, much higher than the averages of 0.07 and -0.05 from Table 3. This highlights that considerable variability exists in the dependency relationships across the many storm catalogs, linked to storm region, area, and duration.

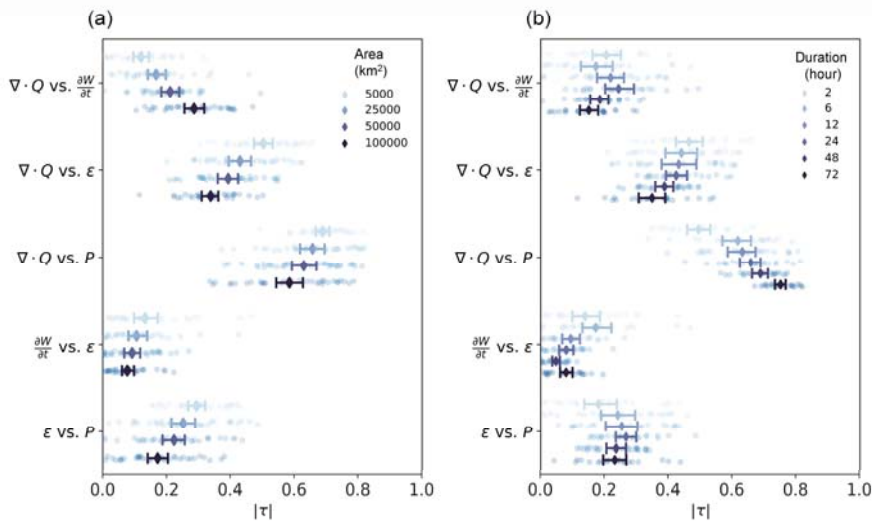

**Figure 10.** The absolute values of correlation coefficient  $\tau$  between water vapor components according to (a) area and (b) duration. Points are the absolute values of  $\tau$  based on each of the annual maximum storm catalogs. Diamonds show the mean of all the computed  $\tau$ ; error bars show the 95% confidence interval of the mean.

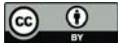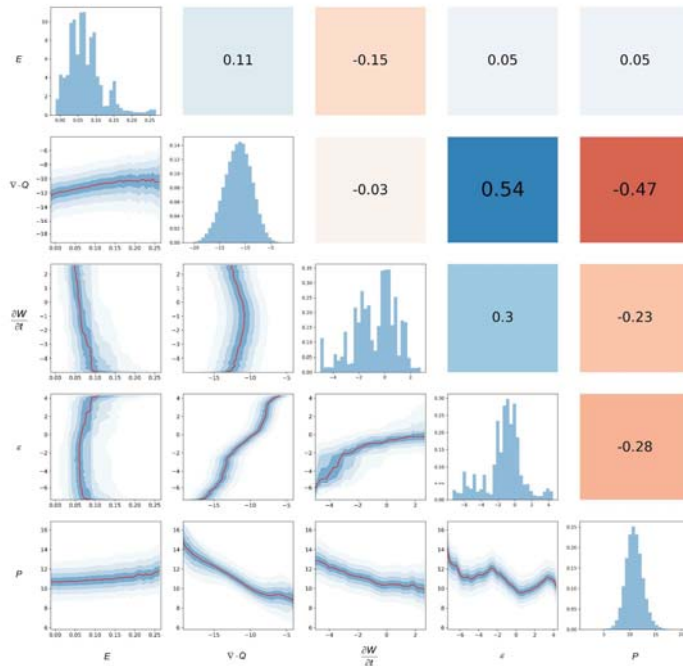

**Figure 11.** Bivariate dependency structure of simulated atmospheric water balance components from the 25,000 km<sup>2</sup>, 2-hour duration storm catalog for the Arkansas-Red Basin. Histograms along the diagonal show the marginal distributions of the individual components. Panels below and left of the diagonal show variation in copula simulations of one water balance component conditioned on another component, with the red line denoting conditional median and blue shading denoting deciles. Panels above and to the right of the diagonal shows Kendall's  $\tau$  correlation coefficients between components.



## 465 5. Discussion

### 5.1 Residual in the atmospheric water balance

The residual term  $\varepsilon$  is introduced in our study to close the atmospheric water balance of reanalysis data, which can affect precipitation estimates. Mass balance errors could come from the data assimilation (DA) scheme and the change of observation systems within ERA5 reanalysis (Mayer et al., 2021; Brown et al., 2019). Studies have also shown that the differencing method  
470 to compute the water vapor flux divergence is another major source of error (Mayer et al., 2021; Gutenstein et al., 2021; Seager and Henderson, 2013). Nonetheless, the average residual is about 10% of the precipitation for all cases, indicating that the ERA5 shows relatively good water balance closure for extreme events in the Mississippi Basin. The residual term is the greatest for 5,000 km<sup>2</sup> and 2-hour storms and approaches zero as duration and area increase. Compared with the univariate model fitted solely on precipitation, the multivariate vine copula model allows us to explicitly include the residual term and model its  
475 dependence structures with other components. In future work, comparisons could be made between vine copulas fitted based on reanalysis and climate models. The latter class of simulations is not subject to DA-related mass balance violations and thus could help to identify the dominant sources of water balance closure error (i.e., DA or differencing).

### 5.2 Bias in ERA5 extreme precipitation

480 ERA5 Reanalysis is based on numerical weather forecasts combined with multiple observations and is subject to multiple error sources, including numerical model errors, observation errors, DA errors, and spatiotemporal heterogeneity of data sources (Bosilovich et al., 2008; Nogueira, 2020). As a result, precipitation bias exists in ERA5 over the study region which can influence our model estimates. Previous studies have shown discrepancies in precipitation climatology between ERA5 and observations over the CONUS. We performed an additional comparison with interpolated gage-based precipitation fields,  
485 supporting that ERA5 underestimates extreme precipitation in the Mississippi Basin (see Appendix B). The underestimation may be related to insufficiently strong water vapor flux divergence, given its primary role in extreme storms and high correlation with precipitation as described in Sect. 4.4. Also, the coarse spatial and temporal resolution of ERA5 may limit its ability to represent small-scale, short-lived convective storms that generate extreme precipitation (Beck et al., 2019; Ebert et al., 2007). Studies have also mentioned precipitation bias coming from orography smoothing and inadequate observations over  
490 mountainous areas (Essou et al., 2017; Jiao et al., 2021). Overall, one must be careful when analyzing extreme storms based on reanalysis, since the accuracy can vary greatly in space and time depending on topography, climate region, and the quantity and quality of assimilated observations (Ebert et al., 2007; Essou et al., 2017; Zhang et al., 2018).





### 5.3 Connection to DAD and area reduction factors

495 Our “storm-centered” approach allows the estimation of precipitation frequency for a specific area and duration within a region  
(as shown in Sect. 4.3). This constitutes an alternative way to approach the longstanding task of deriving DAD relationships,  
i.e., describing how extreme precipitation depth varies with averaging area and duration, usually for the purpose of flood  
analysis (Alexander, 1963; USACE, 1973; Weather Bureau, 1946). It should be noted, however, that the derivation of DAD  
from individual storms has generally not been extended to recurrence intervals as is done here (e.g., in Fig. 8). The one notable  
500 exception that we are aware of is stochastic storm transposition (Alexander, 1963; Foufoula-Georgiou, 1989; Wright et al.,  
2020). Our method—which can produce ARI estimates associated with DAD relationships—shares SST’s focus on storm  
catalogs (Wright et al., 2013; Zhou et al., 2019). While it is not the primary focus of this study, we show the potential of the  
“storm-centered” idea to address the old question of DAD relationships, with the help of advancements in precipitation  
products and storm tracking methods.

505 Both DAD and our approach also share a connection to area reduction factors (ARFs), which are fractions between zero and  
one that depict the ratio of average precipitation depth over an area to a point-scale precipitation depth, given a fixed duration.  
DAD and ARF are highly related concepts, despite serving somewhat different purposes. ARFs are used to convert gage-based  
(i.e., point-scale) precipitation frequency estimates to areal estimates of the same ARI and duration (e.g., Kao & Deneale, 2021;  
Miller, 1964; Olivera et al., 2008). Most ARF studies have tried to obtain such ratios using a “fixed-area” approach, i.e., to  
510 relate precipitation depth from point to area at a fixed location (e.g., Asquith and Famiglietti, 2000; Breinl et al., 2020; Durrans  
et al., 2002), though others have argued that storm-centered ARF approaches are more conceptually valid (Kim and Kang,  
2017; Thorndahl et al., 2019; Wright et al., 2014). The ability to derive storm-centered DAD relationships using our method  
can in principle obviate the need for ARFs entirely, something that has been advocated previously (Wright et al., 2014).  
Another contention within the ARF literature is whether or not such ratios are independent of recurrence intervals (Greener  
515 and Roesch, 1997; Osborn et al., 1980; Pavlovic et al., 2016). Relevant to this debate, we found that DAD appears to be  
independent of recurrence intervals for 5,000-100,000 km<sup>2</sup> scales in the Mississippi Basin.

### 5.4 Interpretation of average recurrence intervals

The ARI is conventionally interpreted as the expected time interval (in years) between events exceeding a certain magnitude  
520 at one specific location (Coles, 2001; Serinaldi, 2015). On the contrary, our “storm-centered” approach identified all the storms  
at different locations within the basin to create annual maximum storm catalogs. As a result, the ARI estimates in our study  
describe the probability that an extreme storm will happen somewhere within a region (e.g., the Mississippi basin or subbasin),  
while the specific storm location is not specified. Examples of equivalent formulations of ARI can be found in Bosma et al.  
(2020) and Zhu et al. (2013). Moving from this formulation to the computation of ARIs at one specific site (e.g., a watershed)

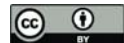

525 requires one to model the storm spatial arrival process, which describes the probability that the extreme storm “hits” the chosen  
site (e.g., Nathan et al., 2016; Wilson & Foufoula-Georgiou, 1990; Wright et al., 2020). The arrival process is challenging  
because storm occurrence rate can vary greatly across a region due to inhomogeneous precipitation properties (e.g., Wilson &  
Foufoula-Georgiou, 1990; Wright et al., 2020; Yu et al., 2021). One simplification is to assume that storm position is  
independent of storm characteristics, and the storm center is equally likely to occur within the basin (Alexander, 1969;  
530 Foufoula-Georgiou, 1989). Then, the exceedance probability at a specific watershed within the basin can be written as:

$$P_c(X > x) = \frac{A_c}{A_s} \cdot P_s(X > x) \quad (14)$$

where  $P_c(X > x)$  is the exceedance probability of precipitation  $X$  at the specific watershed,  $A_c$  is the watershed area,  $A_s$  is the  
basin area where the annual maxima storm catalog is built,  $P_s(X > x)$  is the exceedance probability obtained based on the  
vine copulas model in this study. More complex arrival formulations could consider watershed shape and orientation (Wright  
535 et al., 2013). Such arrival processes could be realized using stochastic models (Foufoula-Georgiou, 1989; Wilson and Foufoula-  
Georgiou, 1990; England et al., 2014) or Monte Carlo simulations (Wright et al., 2013; Zhou et al., 2019; Yu et al., 2021), but  
are beyond the scope of this study.

### 5.5 Nonstationarity in multivariate models

540 Changes in annual and extreme precipitation due to anthropogenic climate change in the Mississippi Basin have been observed  
and investigated in many studies (e.g., Karl & Knight, 1998; Groisman et al., 2004; Pan et al., 2016; Gori et al., 2022), with  
important implications for precipitation frequency estimates (e.g., Milly et al., 2008; Bender et al., 2014; Zscheischler et al.,  
2018). For multivariate distribution models (e.g., copulas), nonstationarities may exist in the marginal distributions of random  
variables or their relationships, i.e., dependency structures (Xu et al., 2020). Our approach can consider nonstationarities by  
545 using marginal distributions and dependence structures with parameters that vary as a function of, e.g., time, temperature, or  
climate indices in vine copulas (for examples, see Bender et al., 2014; Jiang et al., 2015; Sarhadi et al., 2018; Xu et al., 2020).  
This attribute gives our method more flexibility to analyze extreme storm frequency in a changing climate, especially to reveal  
nonstationary relationships between moisture components. Nevertheless, we expect high uncertainties when using  
nonstationary models due to statistical issues (Serinaldi and Kilsby, 2015) and a lack of clarity around precipitation change  
550 across gridded precipitation datasets (Mallakpour et al., 2022). Therefore, multi-model trend comparison and careful  
interpretation are necessary components for nonstationary modeling (Mallakpour et al., 2022), especially when using  
reanalysis that exhibits substantial inter-model variability (Alexander et al., 2020). As mentioned above, such modeling is  
potentially within reach of our framework, but is beyond the scope of this study.



## 6. Summary and conclusions

555 In the study, we present a storm-centered multivariate copula model based on the atmospheric water balance equation to estimate the frequency of extreme spatiotemporal precipitation. The model was applied to extreme precipitation within the Mississippi Basin. Two-dimensional storm objects were identified using the Storm Tracking and Regional Characterization (STARCH) method applied to ERA5 precipitation fields over the contiguous United States from 1951 to 2020. STARCH identified storm objects at each time step, then merged these across time to track storms. Afterward, an area-duration selection  
560 algorithm was used to extract the largest storms from each year with specific areas and durations in order to create “storm catalogs,” each of 70 annual maxima. Selected areas were 5,000, 25,000, 50,000, and 100,000 km<sup>2</sup> and durations were 2, 6, 12, 24, 48, and 72 hours. This selection process was applied to the whole Mississippi Basin and its five major subbasins, resulting in 144 storm catalogs. Using the STARCH method, the spatiotemporal properties of ERA5 storms were validated against the observation-based IMERG precipitation dataset, showing good consistency.

565 The annual maximum precipitation distribution was represented using a joint distribution of atmospheric water balance components: land surface evapotranspiration, water vapor flux divergence, the time-derivative of water vapor storage, and a residual error term. The latter was included to account for imperfect water balance closure in ERA5. Within each storm catalog, water balance components from ERA5 were computed for each annual maximum storm object and fitted to a multivariate vine copula model. This model used a GEV marginal distribution for the divergence term and empirical distributions for the other  
570 components. The fitted model was then used to simulate samples of water balance components to calculate associated precipitation via the water balance equation. The frequency of annual precipitation maxima was then estimated nonparametrically based on these simulations. The following conclusions can be drawn:

1. It is feasible to generate plausible extreme precipitation estimates from a vine copula model that incorporates additional physical information from the atmospheric water balance. Good fits were found based on Q-Q plots and comparisons of  
575 estimated ARI against those from more conventional univariate GEV distributions fitted to ERA5 precipitation. This indicates that the copula approach can represent the complex dependence structures between water balance components. Percent differences between the vine and univariate GEV models were on average less than 4% for the 100-year ARI, but increased for rarer quantiles.
2. Among water balance components, water vapor flux divergence is the dominant term in extreme precipitation. Land  
580 surface evapotranspiration plays the smallest role, constituting about 3% of precipitation. The sum of the time-derivative of precipitable water and residual terms constitute an average of 17% of precipitation. Nonlinear dependencies among water balance components vary with storm region, area, and duration; these cannot be neglected when modeling their joint roles in extreme precipitation.
3. Prior studies have shown that, due to data assimilation and numerical methods, the atmospheric water vapor mass in ERA5  
585 is not perfectly conserved. Despite this, we found relatively good atmospheric water balance closure for extreme events



in the Mississippi Basin, with the residual on average constituting about 10% of precipitation. To our knowledge, this is the first study that examines atmospheric water balance closure for precipitation extremes in reanalysis data. The residual term is the greatest in the 5,000 km<sup>2</sup> and 2-hour storm catalogs and approaches zero as duration and area increase. Users need to treat the residual carefully when examining extreme precipitation from reanalysis (and possibly other atmospheric simulations such as climate models), especially for short durations and small spatial scales.

590

4. Despite the advancement in numerical and data assimilation schemes, ERA5 is still subject to model bias; it tends to underestimate extreme precipitation over the Mississippi Basin. This bias may be attributable to the inadequate simulation of water vapor flux divergence due to its dominant role in precipitation extremes. Also, coarse spatiotemporal resolution and limited observations for assimilation over mountainous areas can contribute further to precipitation biases.

Overall, rainfall frequency analysis can benefit from utilizing additional information from atmospheric/land surface processes. Compared with the conventional approach, the vine copula model allows an explicit representation of the dependence structures between atmospheric water balance components and enables us to investigate the main driver of extreme precipitation. The model does not need an explicit parametric form for the tail of the precipitation distribution, as it is determined by the tail of the moisture components and their dependence structures. This dependence structure can also serve as a constraint that prevents unrealistic large estimates (Bevacqua et al., 2017). Though not explored here due to the complications in interpreting the results (e.g., nonstationary ARIs), the approach is also able to accommodate nonstationary conditions by incorporating marginal distributions and dependence structures that vary with time or according to other climate predictions (e.g., temperature or climate indices, see Bender et al., 2014; Sarhadi et al., 2018; Xu et al., 2020).

600

Our “storm-centered” approach enables us to focus on the major extreme storms over a region, notwithstanding ERA5’s tendency to underestimate those extremes. This feature contrasts with more typical gage-based analyses that may restrict the number of extreme events due to a limited sampling area. By preserving the spatiotemporal structure of the storms, we can investigate extreme precipitation frequency in user-defined areas. Such areal precipitation estimates demonstrate the potential of using the “storm-centered” idea to derive DAD relationships for storms with different ARIs, with the help of long-term reanalysis products and storm tracking techniques.

605

The ARIs estimated by our approach represent the frequencies of extreme storms that happen over the entire region. To obtain precipitation ARIs for one specific site within that basin, an additional storm arrival process (i.e., the probability that the storm “hits” the site) is needed to modify the ARI estimates. Such arrival processes can be realized using statistical models or Monte Carlo simulations and will be a direction of future study. Despite evident biases in extreme precipitation, reasonable atmospheric water balance closure can be found in ERA5, lending confidence that it and similar reanalyses can represent reasonable water vapor interactions (Brown and Kummerow, 2014) which can help to understand the mechanisms of extreme events. In the longer run, the performance of this approach can be expected to benefit from further developments in numerical weather simulation and data assimilation.

610

615



**Appendix A: 10-year and 500-year precipitation estimates of the vine copula model.**

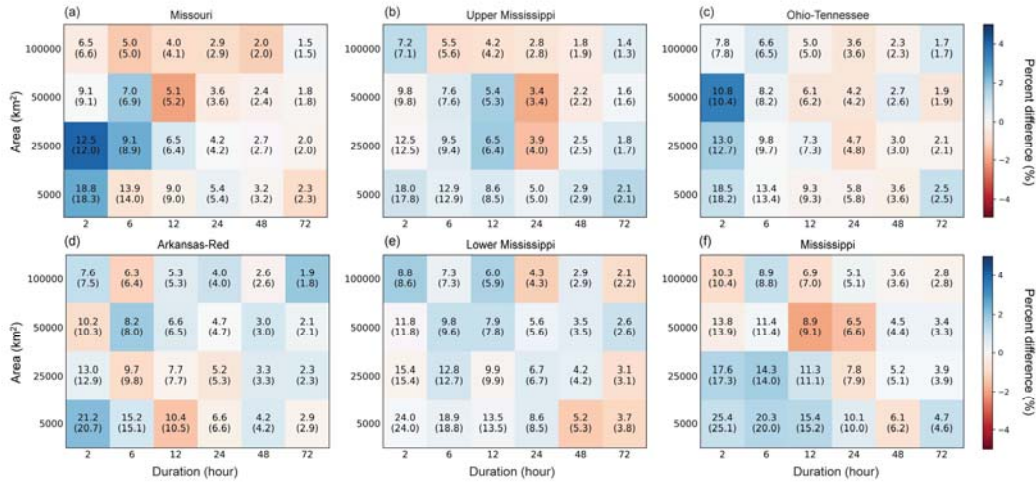

620 **Figure A1.** Estimated 10-year precipitation from vine copula and univariate GEV models. The GEV estimates are in parentheses.

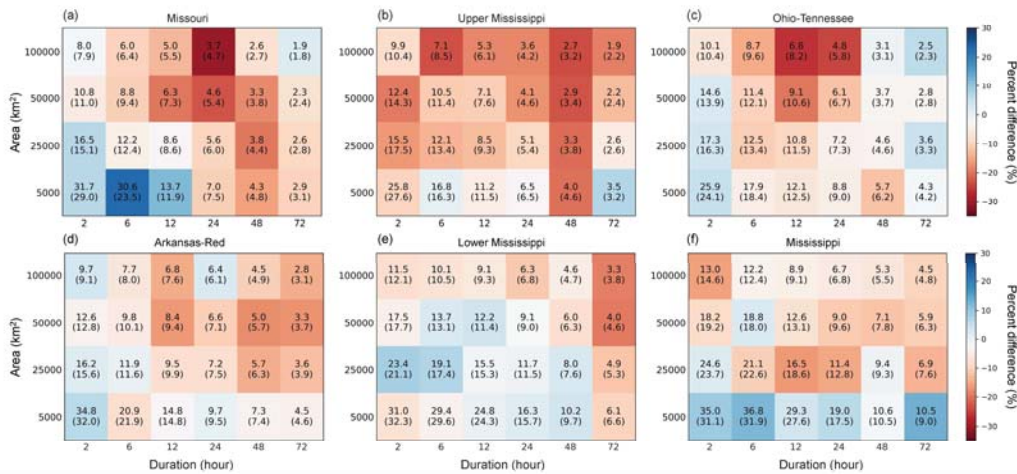

**Figure A2.** Estimated 500-year precipitation from vine copula and univariate GEV models. The GEV estimates are in parentheses.



625 **Appendix B: Comparison of ERA5 and nClimgrid extreme precipitation**

To better assess the bias in ERA5 extreme precipitation, here we provide a comparison between ERA5 reanalysis and a gage-based product, the Gridded 5km GHCN-Daily Temperature and Precipitation Dataset (nClimGrid, Vose et al., 2014), which provides daily precipitation on a 0.05° grid for CONUS by interpolating gage observations. The nClimGrid data were regridded to 0.25° using the conservative method described in Sect. 2.2 to match ERA5’s spatial resolution. To match the temporal resolutions of the two datasets, we shifted the ERA5 time zone from Universal Time Coordinated (UTC) to Central Standard Time (CST) and computed daily precipitation using the daily interval (7 am-7 am) in nClimGrid. ERA5 daily precipitation patterns were generally consistent with those from nClimGrid, suggesting similar storm spatiotemporal properties (results not shown). We computed the difference in the 99<sup>th</sup> percentile daily precipitation between ERA5 and nClimGrid in the 1951-2020 period, shown in Figure B1. Basin-average 99<sup>th</sup> daily precipitation from ERA5 and nClimGrid and their differences are summarized in Table B1. ERA5 99<sup>th</sup> percentile of daily precipitation is on average 8% lower than that of nClimgrid in the Mississippi Basin, with strong spatial variation across subbasins. Specifically, ERA5 underestimates extreme precipitation in the Lower Mississippi Basin; this underestimation diminishes in more inland areas. On the other hand, ERA5 overestimates precipitation over the mountainous areas in the west Missouri Basin.

640

**Table B1.** Comparison of basin-averaged 99<sup>th</sup> percentile daily precipitation between ERA5 and nClimGrid from 1951 to 2020. The percent difference is computed by  $(n\text{ClimGrid}-\text{ERA5})/n\text{ClimGrid} \times 100$ .

| Basin name        | ERA5 (mm/h) | nClimGrid<br>(mm/h) | nClimGrid-ERA5<br>(mm/h) | Percent difference<br>(%) |
|-------------------|-------------|---------------------|--------------------------|---------------------------|
| Mississippi       | 1.13        | 1.22                | 0.10                     | 7.97                      |
| Arkansas-Red      | 1.21        | 1.38                | 0.17                     | 12.12                     |
| Lower Mississippi | 1.67        | 2.10                | 0.43                     | 20.56                     |
| Missouri          | 0.89        | 0.88                | -0.008                   | -0.92                     |
| Upper Mississippi | 1.21        | 1.31                | 0.10                     | 7.82                      |
| Ohio-Tennessee    | 1.34        | 1.48                | 0.14                     | 9.53                      |

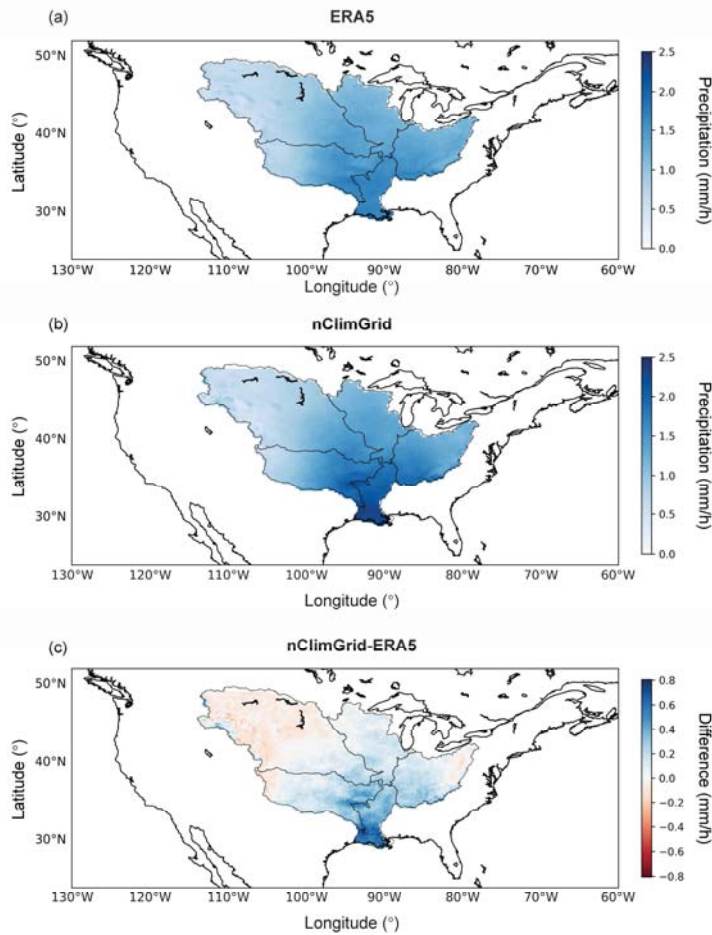

645

**Figure B1.** 99<sup>th</sup> percentile daily precipitation during 1951-2020 for (a) ERA5 and (b) nClimGrid, and (c) the difference between the two datasets.

650



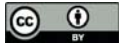

*Code availability:* The STARCH code is available at Github: <https://github.com/lorenliu13/starch>. Other codes from this study are available from the authors upon request.

*Data availability:* ERA5 Reanalysis data can be downloaded from ECMWF Climate Data Store  
655 (<https://cds.climate.copernicus.eu/cdsapp#!/dataset/reanalysis-era5-single-levels?tab=overview>). IMERG V06B satellite precipitation data is available at: <https://gpm.nasa.gov/data/directory>.

*Author Contributions:* YL and DBW worked together to set up the study idea and perform the modeling analysis. YL developed the code for the method in the study. YL wrote the paper with contributions from **all** the co-authors.

660

**both**

*Competing interests:* The authors declare that they have no conflict of interest.

*Acknowledgements:* Yuan Liu's and Daniel B. Wright's contributions were supported by the U.S. National Science Foundation (NSF) Hydrologic Sciences Program (award number 1749638).

665

## References

- Aas, K., Czado, C., Frigessi, A., and Bakken, H.: Pair-copula constructions of multiple dependence, *Insurance: Mathematics and Economics*, 44, 182–198, <https://doi.org/10.1016/j.insmatheco.2007.02.001>, 2009.
- Abdi, H.: The Kendall rank correlation coefficient, 508–510, 2007.
- 670 Alaya, M. A. B., Zwiers, F., and Zhang, X.: Probable Maximum Precipitation: Its Estimation and Uncertainty Quantification Using Bivariate Extreme Value Analysis, 19, 679–694, 2018.
- Alaya, M. A. B., Zwiers, F. W., and Zhang, X.: A bivariate approach to estimating the probability of very extreme precipitation events, *Weather and Climate Extremes*, 30, 100290, <https://doi.org/10.1016/j.wace.2020.100290>, 2020.
- 675 Alexander, G. N.: Using the probability of storm transposition for estimating the frequency of rare floods, *Journal of Hydrology*, 1, 46–57, [https://doi.org/10.1016/0022-1694\(63\)90032-5](https://doi.org/10.1016/0022-1694(63)90032-5), 1963.
- Alexander, G. N.: Application of probability to spillway design flood estimation, in: *Proceedings of the Leningrad Symposium on Floods and Their Computation*, International Association of Scientific Hydrology, Gentbrugge, Belgium, 536–543, 1969.





- Alexander, L. V., Bador, M., Roca, R., Contractor, S., Donat, M. G., and Nguyen, P. L.: Intercomparison of annual precipitation indices and extremes over global land areas from in situ, space-based and reanalysis products, *Environ. Res. Lett.*, 15, 055002, 680 <https://doi.org/10.1088/1748-9326/ab79e2>, 2020.
- Allison, M. A., Vosburg, B. M., Ramirez, M. T., and Meselhe, E. A.: Mississippi River channel response to the Bonnet Carré Spillway opening in the 2011 flood and its implications for the design and operation of river diversions, *Journal of Hydrology*, 477, 104–118, <https://doi.org/10.1016/j.jhydrol.2012.11.011>, 2013.
- Asquith, W. H. and Famiglietti, J. S.: Precipitation areal-reduction factor estimation using an annual-maxima centered approach, *Journal of Hydrology*, 230, 15, [https://doi.org/10.1016/S0022-1694\(00\)00170-0](https://doi.org/10.1016/S0022-1694(00)00170-0), 2000.
- Banacos, P. C. and Schultz, D. M.: The Use of Moisture Flux Convergence in Forecasting Convective Initiation: Historical and Operational Perspectives, 20, <https://doi.org/10.1175/waf858.1>, 2005.
- Beck, H. E., Pan, M., Roy, T., Weedon, G. P., Pappenberger, F., van Dijk, A. I. J. M., Huffman, G. J., Adler, R. F., and Wood, E. F.: Daily evaluation of 26 precipitation datasets using Stage-IV gauge-radar data for the CONUS, 23, 207–224, 690 <https://doi.org/10.5194/hess-23-207-2019>, 2019.
- Bender, J., Wahl, T., and Jensen, J.: Multivariate design in the presence of non-stationarity, *Journal of Hydrology*, 514, 123–130, <https://doi.org/10.1016/j.jhydrol.2014.04.017>, 2014.
- Benedict, I., van Heerwaarden, C. C., van der Ent, R. J., Weerts, A. H., and Hazeleger, W.: Decline in Terrestrial Moisture Sources of the Mississippi River Basin in a Future Climate, 21, 299–316, <https://doi.org/10.1175/JHM-D-19-0094.1>, 2020.
- 695 Berrisford, P., Kållberg, P., Kobayashi, S., Dee, D., Uppala, S., Simmons, A. J., Poli, P., and Sato, H.: Atmospheric conservation properties in ERA-Interim, 137, 1381–1399, <https://doi.org/10.1002/qj.864>, 2011.
- Bevacqua, E., Maraun, D., Hobæk Haff, I., Widmann, M., and Vrac, M.: Multivariate statistical modelling of compound events via pair-copula constructions: analysis of floods in Ravenna (Italy), 21, 2701–2723, <https://doi.org/10.5194/hess-21-2701-2017>, 2017.
- 700 Bosilovich, M. G., Chen, J., Robertson, F. R., and Adler, R. F.: Evaluation of Global Precipitation in Reanalyses, 47, 2279–2299, <https://doi.org/10.1175/2008JAMC1921.1>, 2008.
- Bosma, C. D., Wright, D. B., Nguyen, P., Kossin, J. P., Herndon, D. C., and Shepherd, J. M.: An Intuitive Metric to Quantify and Communicate Tropical Cyclone Rainfall Hazard, 101, E206–E220, <https://doi.org/10.1175/BAMS-D-19-0075.1>, 2020.
- Bradbury, D.: Moisture Analysis and Water Budget in Three Different Types of Storms, 14, [https://doi.org/10.1175/1520-0469\(1957\)014<0559:maawbi>2.0.co;2](https://doi.org/10.1175/1520-0469(1957)014<0559:maawbi>2.0.co;2), 1957.
- 705 Breinl, K., Müller-Thomy, H., and Blöschl, G.: Space–Time Characteristics of Areal Reduction Factors and Rainfall Processes, 21, 671–689, <https://doi.org/10.1175/JHM-D-19-0228.1>, 2020.
- Brown, P. J. and Kummerow, C. D.: An Assessment of Atmospheric Water Budget Components over Tropical Oceans, 27, 2054–2071, <https://doi.org/10.1175/JCLI-D-13-00385.1>, 2014.
- 710 Chang, W., Stein, M. L., Wang, J., Kotamarthi, V. R., and Moyer, E. J.: Changes in Spatiotemporal Precipitation Patterns in Changing Climate Conditions, 29, 8355–8376, <https://doi.org/10.1175/JCLI-D-15-0844.1>, 2016.



- Chen, L.-C. and Bradley, A. A.: Adequacy of using surface humidity to estimate atmospheric moisture availability for probable maximum precipitation, 42, <https://doi.org/10.1029/2005WR004469>, 2006.
- Coles, S.: *An Introduction to Statistical Modeling of Extreme Values*, Springer, UK, 2001.
- 715 Cunnane, C.: Unbiased plotting positions — A review, *Journal of Hydrology*, 37, 205–222, [https://doi.org/10.1016/0022-1694\(78\)90017-3](https://doi.org/10.1016/0022-1694(78)90017-3), 1978.
- Davis, C., Brown, B., and Bullock, R.: Object-Based Verification of Precipitation Forecasts. Part I: Methodology and Application to Mesoscale Rain Areas, 134, 1772–1784, <https://doi.org/10.1175/MWR3145.1>, 2006.
- 720 Dawdy, D. R., Griffis, V. W., and Gupta, V. K.: Regional Flood-Frequency Analysis: How We Got Here and Where We Are Going, *J. Hydrol. Eng.*, 17, 953–959, [https://doi.org/10.1061/\(ASCE\)HE.1943-5584.0000584](https://doi.org/10.1061/(ASCE)HE.1943-5584.0000584), 2012.
- De Michele, C. and Salvadori, G.: A Generalized Pareto intensity-duration model of storm rainfall exploiting 2-Copulas, 108, <https://doi.org/10.1029/2002JD002534>, 2003.
- Dingman, S. L.: *Physical hydrology*, Third edition., Waveland Press, Inc, Long Grove, Illinois, 643 pp., 2015.
- 725 Dixon, M. and Wiener, G.: TITAN: Thunder Identification, Tracking, Analysis, and Nowcasting - A Radar-based Methodology, 10, 1993.
- Durrans, S. R., Julian, L. T., and Yekta, M.: Estimation of Depth-Area Relationships using Radar-Rainfall Data, *J. Hydrol. Eng.*, 7, 356–367, [https://doi.org/10.1061/\(ASCE\)1084-0699\(2002\)7:5\(356\)](https://doi.org/10.1061/(ASCE)1084-0699(2002)7:5(356)), 2002.
- Ebert, E. E., Janowiak, J. E., and Kidd, C.: Comparison of Near-Real-Time Precipitation Estimates from Satellite Observations and Numerical Models, 88, 47–64, <https://doi.org/10.1175/BAMS-88-1-47>, 2007.
- 730 Efstratiadis, A., Koussis, A. D., Koutsoyiannis, D., and Mamassis, N.: Flood design recipes vs. reality: can predictions for ungauged basins be trusted?, 14, 1417–1428, <https://doi.org/10.5194/nhess-14-1417-2014>, 2014.
- England, J. F., Julien, P. Y., and Velleux, M. L.: Physically-based extreme flood frequency with stochastic storm transposition and paleoflood data on large watersheds, 510, 228–245, <https://doi.org/10.1016/j.jhydrol.2013.12.021>, 2014.
- 735 Essou, G. R. C., Brissette, F., and Lucas-Picher, P.: The Use of Reanalyses and Gridded Observations as Weather Input Data for a Hydrological Model: Comparison of Performances of Simulated River Flows Based on the Density of Weather Stations, 18, 497–513, <https://doi.org/10.1175/JHM-D-16-0088.1>, 2017.
- Foufoula-Georgiou, E.: A probabilistic storm transposition approach for estimating exceedance probabilities of extreme precipitation depths, 25, 799–815, <https://doi.org/10.1029/WR025i005p00799>, 1989.
- 740 Gao, S., Cui, X., Zhou, Y., and Li, X.: Surface rainfall processes as simulated in a cloud-resolving model, 110, <https://doi.org/10.1029/2004JD005467>, 2005.
- Gilleland, E.: *extRemes: Extreme Value Analysis*, 2021.
- Gori, A., Lin, N., Xi, D., and Emanuel, K.: Tropical cyclone climatology change greatly exacerbates US extreme rainfall-surge hazard, *Nat. Clim. Chang.*, 12, 171–178, <https://doi.org/10.1038/s41558-021-01272-7>, 2022.
- Greener, D. and Roesch, T.: Regional dependence and application of DAD relationships, 8, 1997.

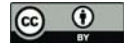

- 745 Groisman, P. Y., Knight, R. W., Karl, T. R., Easterling, D. R., Sun, B., and Lawrimore, J. H.: Contemporary Changes of the Hydrological Cycle over the Contiguous United States: Trends Derived from In Situ Observations, *5*, 22, 2004.
- Gubareva, T. and Gartsman, B.: Estimating distribution parameters of extreme hydrometeorological characteristics by L-moments method, *Water Resources*, *37*, 437–445, <https://doi.org/10.1134/S0097807810040020>, 2010.
- 750 Gutenstein, M., Fennig, K., Schröder, M., Trent, T., Bakan, S., Roberts, J. B., and Robertson, F. R.: Intercomparison of freshwater fluxes over ocean and investigations into water budget closure, *25*, 121–146, <https://doi.org/10.5194/hess-25-121-2021>, 2021.
- Gyasi-Agyei, Y. and Melching, C.: Modelling the dependence and internal structure of storm events for continuous rainfall simulation, *Journal of Hydrology*, *s 464–465*, 249–261, <https://doi.org/10.1016/j.jhydrol.2012.07.014>, 2012.
- 755 Hersbach, H., Bell, B., Berrisford, P., Hirahara, S., Horányi, A., Muñoz-Sabater, J., Nicolas, J., Peubey, C., Radu, R., Schepers, D., Simmons, A., Soci, C., Abdalla, S., Abellan, X., Balsamo, G., Bechtold, P., Biavati, G., Bidlot, J., Bonavita, M., De Chiara, G., Dahlgren, P., Dee, D., Diamantakis, M., Dragani, R., Flemming, J., Forbes, R., Fuentes, M., Geer, A., Haimberger, L., Healy, S., Hogan, R. J., Hólm, E., Janisková, M., Keeley, S., Laloyaux, P., Lopez, P., Lupu, C., Radnoti, G., de Rosnay, P., Rozum, I., Vamborg, F., Villaume, S., and Thépaut, J.-N.: The ERA5 global reanalysis, *146*, 1999–2049, <https://doi.org/10.1002/qj.3803>, 2020.
- 760 Holman, K. D. and Vavrus, S. J.: Understanding Simulated Extreme Precipitation Events in Madison, Wisconsin, and the Role of Moisture Flux Convergence during the Late Twentieth and Twenty-First Centuries\*, *13*, 877–894, <https://doi.org/10.1175/JHM-D-11-052.1>, 2012.
- Hoskins, B. J. and Hodges, K. I.: New Perspectives on the Northern Hemisphere Winter Storm Tracks, *59*, 21, 2002.
- 765 Huffman, G., Bolvin, D., Braithwaite, D., Hsu, K., Joyce, R., Kidd, C., Nelkin, E., Sorooshian, S., Tan, J., Xie, P., and others: NASA global precipitation measurement (GPM) integrated multi-satellite retrievals for GPM (IMERG). Algorithm theoretical basis document (ATBD) version 06, 2019.
- Jiang, C., Xiong, L., Xu, C.-Y., and Guo, S.: Bivariate frequency analysis of nonstationary low-flow series based on the time-varying copula, *29*, 1521–1534, <https://doi.org/10.1002/hyp.10288>, 2015.
- 770 Jiao, D., Xu, N., Yang, F., and Xu, K.: Evaluation of spatial-temporal variation performance of ERA5 precipitation data in China, *Sci Rep*, *11*, 17956, <https://doi.org/10.1038/s41598-021-97432-y>, 2021.
- Jun, C., Qin, X., Gan, T. Y., Tung, Y.-K., and De Michele, C.: Bivariate frequency analysis of rainfall intensity and duration for urban stormwater infrastructure design, *Journal of Hydrology*, *553*, 374–383, <https://doi.org/10.1016/j.jhydrol.2017.08.004>, 2017.
- 775 Kao, S.-C. and Deneale, S. T.: Application of Point Precipitation Frequency Estimates to Watersheds, Oak Ridge National Lab. (ORNL), Oak Ridge, TN (United States), <https://doi.org/10.2172/1808414>, 2021.
- Karl, T. R. and Knight, R. W.: Secular Trends of Precipitation Amount, Frequency, and Intensity in the United States, *79*, 231–242, [https://doi.org/10.1175/1520-0477\(1998\)079<0231:STOPAF>2.0.CO;2](https://doi.org/10.1175/1520-0477(1998)079<0231:STOPAF>2.0.CO;2), 1998.
- Katz, R. W., Parlange, M. B., and Naveau, P.: Statistics of extremes in hydrology, *Advances in Water Resources*, *25*, 1287–1304, [https://doi.org/10.1016/S0309-1708\(02\)00056-8](https://doi.org/10.1016/S0309-1708(02)00056-8), 2002.



- 780 Kim, E. and Kang, B.: Estimation of Storm-centered ARF Using Radar Rainfall by Duration and Return Periods, in: Proceedings of the 2017 2nd International Conference on Modelling, Simulation and Applied Mathematics (MSAM2017), 2017 2nd International Conference on Modelling, Simulation and Applied Mathematics (MSAM2017), Bangkok, Thailand, <https://doi.org/10.2991/msam-17.2017.59>, 2017.
- 785 Kim, S., Sharma, A., Wasko, C., and Nathan, R.: Linking total precipitable water to precipitation extremes globally, n/a, e2021EF002473, <https://doi.org/10.1029/2021EF002473>, 2022.
- Klemeš, V.: Probability of extreme hydrometeorological events - a different approach, in: Proceedings of the Yokohama Symposium, 1993.
- Koutsoyiannis, D., Kozonis, D., and Manetas, A.: A mathematical framework for studying rainfall intensity-duration-frequency relationships, *Journal of Hydrology*, 206, 118–135, [https://doi.org/10.1016/S0022-1694\(98\)00097-3](https://doi.org/10.1016/S0022-1694(98)00097-3), 1998.
- 790 Krajewski, W. F.: Cokriging radar-rainfall and rain gage data, 92, 9571–9580, <https://doi.org/10.1029/JD092iD08p09571>, 1987.
- Kunkel, K. E., Easterling, D. R., Karl, T. R., Biard, J. C., Champion, S. M., Gleason, B. E., Johnson, K. M., Li, A., Stegall, S., Stevens, L. E., Stevens, S. E., Squires, M., Sun, L., and Yin, X.: Incorporation of the Effects of Future Anthropogenically-Forced Climate Change in Intensity-Duration-Frequency Design Values, North Carolina Institute for Climate Studies, North Carolina State University, 2020a.
- 795 Kunkel, K. E., Stevens, S. E., Stevens, L. E., and Karl, T. R.: Observed Climatological Relationships of Extreme Daily Precipitation Events With Precipitable Water and Vertical Velocity in the Contiguous United States, *Geophys. Res. Lett.*, 47, <https://doi.org/10.1029/2019GL086721>, 2020b.
- 800 Langousis, A., Veneziano, D., Furcolo, P., and Lepore, C.: Multifractal rainfall extremes: Theoretical analysis and practical estimation, *Chaos, Solitons & Fractals*, 39, 1182–1194, <https://doi.org/10.1016/j.chaos.2007.06.004>, 2009.
- Lee, O. and Kim, S.: Estimation of Future Probable Maximum Precipitation in Korea Using Multiple Regional Climate Models, 10, 637, <https://doi.org/10.3390/w10050637>, 2018.
- Li, Z., Wright, D. B., Zhang, S. Q., Kirschbaum, D. B., and Hartke, S. H.: Object-Based Comparison of Data-Driven and Physics-Driven Satellite Estimates of Extreme Rainfall, 21, 2759–2776, <https://doi.org/10.1175/JHM-D-20-0041.1>, 2020.
- 805 Madsen, H., Rasmussen, P. F., and Rosbjerg, D.: Comparison of annual maximum series and partial duration series methods for modeling extreme hydrologic events: 1. At-site modeling, 33, 747–757, <https://doi.org/10.1029/96WR03848>, 1997.
- Mallakpour, I., Sadeghi, M., Mosaffa, H., Akbari Asanjan, A., Sadegh, M., Nguyen, P., Sorooshian, S., and AghaKouchak, A.: Discrepancies in changes in precipitation characteristics over the contiguous United States based on six daily gridded precipitation datasets, *Weather and Climate Extremes*, 36, 100433, <https://doi.org/10.1016/j.wace.2022.100433>, 2022.
- 810 Matsoukas, C., Islam, S., and Kothari, R.: Fusion of radar and rain gage measurements for an accurate estimation of rainfall, 104, 31437–31450, <https://doi.org/10.1029/1999JD900487>, 1999.
- Miller, J. F.: Two- to Ten-Day Precipitation for Return Periods of 2 to 100 Years in the Contiguous United States, U.S. Weather Bureau, Washington, D.C., 1964.
- 815 Milly, P. C. D., Betancourt, J., Falkenmark, M., Hirsch, R. M., Kundzewicz, Z. W., Lettenmaier, D. P., and Stouffer, R. J.: Stationarity Is Dead: Whither Water Management?, *Science*, 319, 573–574, <https://doi.org/10.1126/science.1151915>, 2008.



- Miniussi, A., Marani, M., and Villarini, G.: Metastatistical Extreme Value Distribution applied to floods across the continental United States, *Advances in Water Resources*, 136, 103498, <https://doi.org/10.1016/j.advwatres.2019.103498>, 2020.
- Mutel, C. F. (Ed.): *A watershed year: anatomy of the Iowa floods of 2008*, University of Iowa Press, Iowa City, 250 pp., 2010.
- Myers, M. F. and White, G. F.: The Challenge of the Mississippi Flood, *Environment: Science and Policy for Sustainable Development*, 35, 6–35, <https://doi.org/10.1080/00139157.1993.9929131>, 1993.
- 820
- Nagler, T., Schepsmeier, U., Stoeber, J., Brechmann, E. C., Graeler, B., Erhardt, T., Almeida, C., Min, A., Czado, C., Hofmann, M., Killiches, M., Joe, H., and Vatter, T.: *VineCopula: Statistical Inference of Vine Copulas*, 2021.
- Nathan, R., Jordan, P., Scoriah, M., Lang, S., Kuczera, G., Schaefer, M., and Weinmann, E.: Estimating the exceedance probability of extreme rainfalls up to the probable maximum precipitation, *Journal of Hydrology*, 543, 706–720, <https://doi.org/10.1016/j.jhydrol.2016.10.044>, 2016.
- 825
- National Research Council: *Estimating probabilities of extreme floods : methods and recommended research*, Washington : National Academy Press, 1988., 1988.
- National Research Council: *Estimating Bounds on Extreme Precipitation Events: A Brief Assessment*, <https://doi.org/10.17226/9195>, 1994.
- 830
- NCAR: *NCAR/Irose-titan, Shell*, National Center for Atmospheric Research, 2019.
- Nerantzaki, S. D. and Papalexiou, S. M.: Assessing extremes in hydroclimatology: A review on probabilistic methods, *Journal of Hydrology*, 605, 127302, <https://doi.org/10.1016/j.jhydrol.2021.127302>, 2022.
- Nogueira, M.: Inter-comparison of ERA-5, ERA-interim and GPCP rainfall over the last 40 years: Process-based analysis of systematic and random differences, *Journal of Hydrology*, 583, 124632, <https://doi.org/10.1016/j.jhydrol.2020.124632>, 2020.
- 835
- Olivera, F., Asce, M., Choi, J., Kim, D., and Li, M.-H.: Estimation of Average Rainfall Areal Reduction Factors in Texas Using NEXRAD Data, *Journal of Hydrologic Engineering*, 13, [https://doi.org/10.1061/\(ASCE\)1084-0699\(2008\)13:6\(438\)](https://doi.org/10.1061/(ASCE)1084-0699(2008)13:6(438)), 2008.
- Osborn, H., Lane, L., and Myers, V. A.: *Rainfall/Watershed Relationships for Southwestern Thunderstorms*, <https://doi.org/10.13031/2013.34529>, 1980.
- 840
- Pal, S., Lee, T. R., and Clark, N. E.: The 2019 Mississippi and Missouri River Flooding and Its Impact on Atmospheric Boundary Layer Dynamics, 47, e2019GL086933, <https://doi.org/10.1029/2019GL086933>, 2020.
- Pan, Z., Zhang, Y., Liu, X., and Gao, Z.: Current and future precipitation extremes over Mississippi and Yangtze River basins as simulated in CMIP5 models, *J. Earth Sci.*, 27, 22–36, <https://doi.org/10.1007/s12583-016-0627-2>, 2016.
- Pavlovic, S., Perica, S., St Laurent, M., and Mejía, A.: Intercomparison of selected fixed-area areal reduction factor methods, *Journal of Hydrology*, 537, 419–430, <https://doi.org/10.1016/j.jhydrol.2016.03.027>, 2016.
- 845
- Pereira, G. and Veiga, Á.: PAR(p)-vine copula based model for stochastic streamflow scenario generation, *Stoch Environ Res Risk Assess*, 32, 833–842, <https://doi.org/10.1007/s00477-017-1411-2>, 2018.

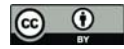

- Pérez-Alarcón, A., Coll-Hidalgo, P., Fernández-Alvarez, J. C., Sorí, R., Nieto, R., and Gimeno, L.: Moisture Sources for Precipitation Associated With Major Hurricanes During 2017 in the North Atlantic Basin, 127, e2021JD035554, 850 <https://doi.org/10.1029/2021JD035554>, 2022.
- Rabalais, N. N., Turner, R. E., Wiseman, W. J., Jr, and Dortch, Q.: Consequences of the 1993 Mississippi River flood in the Gulf of Mexico, 14, 161–177, [https://doi.org/10.1002/\(SICI\)1099-1646\(199803/04\)14:2<161::AID-RRR495>3.0.CO;2-J](https://doi.org/10.1002/(SICI)1099-1646(199803/04)14:2<161::AID-RRR495>3.0.CO;2-J), 1998.
- Rakhecha, P. R. and Clark, C.: Revised estimates of one-day probable maximum precipitation (PMP) for India, 6, 343–350, 855 <https://doi.org/10.1017/s1350482799001280>, 1999.
- Restrepo-Posada, P. J. and Eagleson, P. S.: Identification of independent rainstorms, *Journal of Hydrology*, 55, 303–319, [https://doi.org/10.1016/0022-1694\(82\)90136-6](https://doi.org/10.1016/0022-1694(82)90136-6), 1982.
- Roderick, T. P., Wasko, C., and Sharma, A.: An Improved Covariate for Projecting Future Rainfall Extremes?, 56, e2019WR026924, <https://doi.org/10.1029/2019WR026924>, 2020.
- 860 Rousseau, A. N., Klein, I. M., Freudiger, D., Gagnon, P., Frigon, A., and Ratté-Fortin, C.: Development of a methodology to evaluate probable maximum precipitation (PMP) under changing climate conditions: Application to southern Quebec, Canada, *Journal of Hydrology*, 519, 3094–3109, <https://doi.org/10.1016/j.jhydrol.2014.10.053>, 2014.
- Salvadori, G. and De Michele, C.: On the Use of Copulas in Hydrology: Theory and Practice, 12, 369–380, [https://doi.org/10.1061/\(ASCE\)1084-0699\(2007\)12:4\(369\)](https://doi.org/10.1061/(ASCE)1084-0699(2007)12:4(369)), 2007.
- 865 Sarhadi, A., Ausín, M. C., Wiper, M. P., Touma, D., and Diffenbaugh, N. S.: Multidimensional risk in a nonstationary climate: Joint probability of increasingly severe warm and dry conditions, <https://doi.org/10.1126/sciadv.aau3487>, 2018.
- Schaefer, M. G.: Regional analyses of precipitation annual maxima in Washington State, *Water Resour. Res.*, 26, 119–131, <https://doi.org/10.1029/WR026i001p00119>, 1990.
- 870 Serinaldi, F.: Dismissing return periods!, *Stoch Environ Res Risk Assess*, 29, 1179–1189, <https://doi.org/10.1007/s00477-014-0916-1>, 2015.
- Serinaldi, F. and Kilsby, C. G.: Stationarity is undead: Uncertainty dominates the distribution of extremes, 77, 17–36, <https://doi.org/10.1016/j.advwatres.2014.12.013>, 2015.
- Shaw, T. A., Baldwin, M., Barnes, E. A., Caballero, R., Garfinkel, C. I., Hwang, Y.-T., Li, C., O’Gorman, P. A., Rivière, G., Simpson, I. R., and Voigt, A.: Storm track processes and the opposing influences of climate change, *Nature Geosci*, 9, 656–875 664, <https://doi.org/10.1038/ngeo2783>, 2016.
- Smith, J. A. and Baeck, M. L.: “Prophetic vision, vivid imagination”: The 1927 Mississippi River flood, 51, 9964–9994, <https://doi.org/10.1002/2015WR017927>, 2015.
- Steiner, M., Houze, R. A., and Yuter, S. E.: Climatological Characterization of Three-Dimensional Storm Structure from Operational Radar and Rain Gauge Data, 34, 1978–2007, [https://doi.org/10.1175/1520-0450\(1995\)034<1978:CCOTDS>2.0.CO;2](https://doi.org/10.1175/1520-0450(1995)034<1978:CCOTDS>2.0.CO;2), 1995. 880
- Steiner, M., Smith, J. A., Burges, S. J., Alonso, C. V., and Darden, R. W.: Effect of bias adjustment and rain gauge data quality control on radar rainfall estimation, 35, 2487–2503, <https://doi.org/10.1029/1999WR900142>, 1999.



- Su, Y. and Smith, J. A.: An Atmospheric Water Balance Perspective on Extreme Rainfall Potential for the Contiguous US, *Water Res.*, 57, <https://doi.org/10.1029/2020WR028387>, 2021.
- 885 Sudradjat, A., Brubaker, K. L., and Dirmeyer, P. A.: Interannual variability of surface evaporative moisture sources of warm-season precipitation in the Mississippi River basin, *J. Geophys. Res.-Atmos.*, 108, 8612, <https://doi.org/10.1029/2002JD003061>, 2003.
- Svensson, C. and Jones, D.: Review of methods for deriving area reduction factors, *Journal of Flood Risk Management*, 3, 232–245, <https://doi.org/10.1111/j.1753-318X.2010.01075.x>, 2010.
- 890 Thorndahl, S., Nielsen, J. E., and Rasmussen, M. R.: Estimation of Storm-Centred Areal Reduction Factors From Radar Rainfall for Design in Urban Hydrology, 11, <https://doi.org/10.3390/w11061120>, 2019.
- Toride, K., Iseri, Y., Warner, M. D., Frans, C. D., Duren, A. M., England, J. F., and Kavvas, M. L.: Model-Based Probable Maximum Precipitation Estimation: How to Estimate the Worst-Case Scenario Induced by Atmospheric Rivers?, 20, 2383–2400, <https://doi.org/10.1175/JHM-D-19-0039.1>, 2019.
- 895 Troutman, B. M. and Karlinger, M. R.: Regional flood probabilities, 39, <https://doi.org/10.1029/2001WR001140>, 2003.
- Urraca, R., Huld, T., Gracia-Amillo, A., Martinez-de-Pison, F. J., Kaspar, F., and Sanz-Garcia, A.: Evaluation of global horizontal irradiance estimates from ERA5 and COSMO-REA6 reanalyses using ground and satellite-based data, *Solar Energy*, 164, 339–354, <https://doi.org/10.1016/j.solener.2018.02.059>, 2018.
- USACE: Storm rainfall in the United States, 1973.
- 900 Vernieuwe, H., Vandenberghe, S., De Baets, B., and Verhoest, N.: A continuous rainfall model based on vine copulas, *Hydrology and Earth System Sciences*, 19, 2685–2699, <https://doi.org/10.5194/hess-19-2685-2015>, 2015.
- Villarini, G., Mandapaka, P. V., Krajewski, W. F., and Moore, R. J.: Rainfall and sampling uncertainties: A rain gauge perspective, 113, <https://doi.org/10.1029/2007JD009214>, 2008.
- 905 Vose, R., Applequist, S., Squires, M., Durre, I., Menne, M., Williams Jr, C., Fenimore, C., Gleason, K., and Arndt, D.: Gridded 5km GHCN-daily temperature and precipitation dataset (nCLIMGRID) version 1, 2014.
- Walshaw, D.: Generalized Extreme Value Distribution, in: *Encyclopedia of Environmetrics*, John Wiley & Sons, Ltd, <https://doi.org/10.1002/9780470057339.vae062.pub2>, 2013.
- Weather Bureau: Manual for Depth-Area-Duration analysis of storm precipitation, *Coop. Stud. Tech. Pap.*, 1, 99, 1946.
- Wilson, L. L. and Foufoula-Georgiou, E.: Regional Rainfall Frequency Analysis via Stochastic Storm Transposition, 116, 859–880, [https://doi.org/10.1061/\(ASCE\)0733-9429\(1990\)116:7\(859\)](https://doi.org/10.1061/(ASCE)0733-9429(1990)116:7(859)), 1990.
- World Meteorological Organization: Manual on estimation of probable maximum precipitation (PMP), 2009.
- Wright, D. B., Smith, J. A., Villarini, G., and Baeck, M. L.: Estimating the frequency of extreme rainfall using weather radar and stochastic storm transposition, *Journal of Hydrology*, 488, 150–165, <https://doi.org/10.1016/j.jhydrol.2013.03.003>, 2013.
- 915 Wright, D. B., Smith, J. A., and Baeck, M. L.: Critical examination of area reduction factors, *Journal of Hydrologic Engineering*, 19, 769–776, 2014.





- Wright, D. B., Yu, G., and England, J. F.: Six decades of rainfall and flood frequency analysis using stochastic storm transposition: Review, progress, and prospects, *Journal of Hydrology*, 585, 124816, <https://doi.org/10.1016/j.jhydrol.2020.124816>, 2020.
- 920 Xiong, L., Yu, K., and Gottschalk, L.: Estimation of the distribution of annual runoff from climatic variables using copulas, 50, 7134–7152, <https://doi.org/10.1002/2013WR015159>, 2014.
- Xu, P., Wang, D., Singh, V. P., Lu, H., Wang, Y., Wu, J., Wang, L., Liu, J., and Zhang, J.: Multivariate Hazard Assessment for Nonstationary Seasonal Flood Extremes Considering Climate Change, *J. Geophys. Res. Atmos.*, 125, <https://doi.org/10.1029/2020JD032780>, 2020.
- 925 Yang, X., Xie, X., Liu, D. L., Ji, F., and Wang, L.: Spatial Interpolation of Daily Rainfall Data for Local Climate Impact Assessment over Greater Sydney Region, 2015, e563629, <https://doi.org/10.1155/2015/563629>, 2015.
- Yu, G., Wright, D. B., and Holman, K. D.: Connecting Hydrometeorological Processes to Low-Probability Floods in the Mountainous Colorado Front Range, *Water Resources Research*, 57, e2021WR029768, <https://doi.org/10.1029/2021WR029768>, 2021.
- 930 Zhang, Q., Ye, J., Zhang, S., and Han, F.: Precipitable Water Vapor Retrieval and Analysis by Multiple Data Sources: Ground-Based GNSS, Radio Occultation, Radiosonde, Microwave Satellite, and NWP Reanalysis Data, 2018, e3428303, <https://doi.org/10.1155/2018/3428303>, 2018.
- Zhou, Z., Smith, J. A., Wright, D. B., Baeck, M. L., Yang, L., and Liu, S.: Storm Catalog-Based Analysis of Rainfall Heterogeneity and Frequency in a Complex Terrain, *Water Resources Research*, 55, 1871–1889, <https://doi.org/10.1029/2018WR023567>, 2019.
- 935 Zhu, L., Quiring, S. M., and Emanuel, K. A.: Estimating tropical cyclone precipitation risk in Texas, 40, 6225–6230, <https://doi.org/10.1002/2013GL058284>, 2013.
- Zhuang, J., dussin, raphael, Jüling, A., and Rasp, S.: JiaweiZhuang/xESMF: v0.3.0 Adding ESMF.LocStream capabilities, Zenodo, <https://doi.org/10.5281/zenodo.3700105>, 2020.
- 940 Zscheischler, J., Westra, S., van den Hurk, B. J. J. M., Seneviratne, S. I., Ward, P. J., Pitman, A., AghaKouchak, A., Bresch, D. N., Leonard, M., Wahl, T., and Zhang, X.: Future climate risk from compound events, *Nature Clim Change*, 8, 469–477, <https://doi.org/10.1038/s41558-018-0156-3>, 2018.
